# Supplementary material
Source: PubMed Central journal article supplement (PMC6071945)

## **Supporting Information**

### **Synthesis and biological evaluation of (-)-kunstleramide and its derivatives**

R. Venkateshwarlu<sup>a</sup>, B. Chinnababu<sup>b</sup>, U. Ramulu<sup>b</sup>, K. Purushotham Reddy<sup>b</sup>, M. Damoder Reddy<sup>c</sup>, P. Sowjanya<sup>d</sup>, P. Venkateswara Rao<sup>a</sup> and S. Aravind<sup>a</sup>

*a* Department of Chemistry, Osmania University, Hyderabad, Telangana State, India-500007.

*b* Division of Natural Product Chemistry, CSIR-IICT, Hyderabad, Telangana State, India-500007.

*c* Department of Pharmaceutical Sciences, School of Pharmacy, Union University, 1050 Union University Drive, Jackson, Tennessee, USA-38305.

*d* Division of Chemical Biology, CSIR-IICT, Hyderabad, Telangana State, India-500007.

<sup>1</sup>H & <sup>13</sup>C NMR spectral copies of 5-7, 1a, 1, 8-22.....2-21

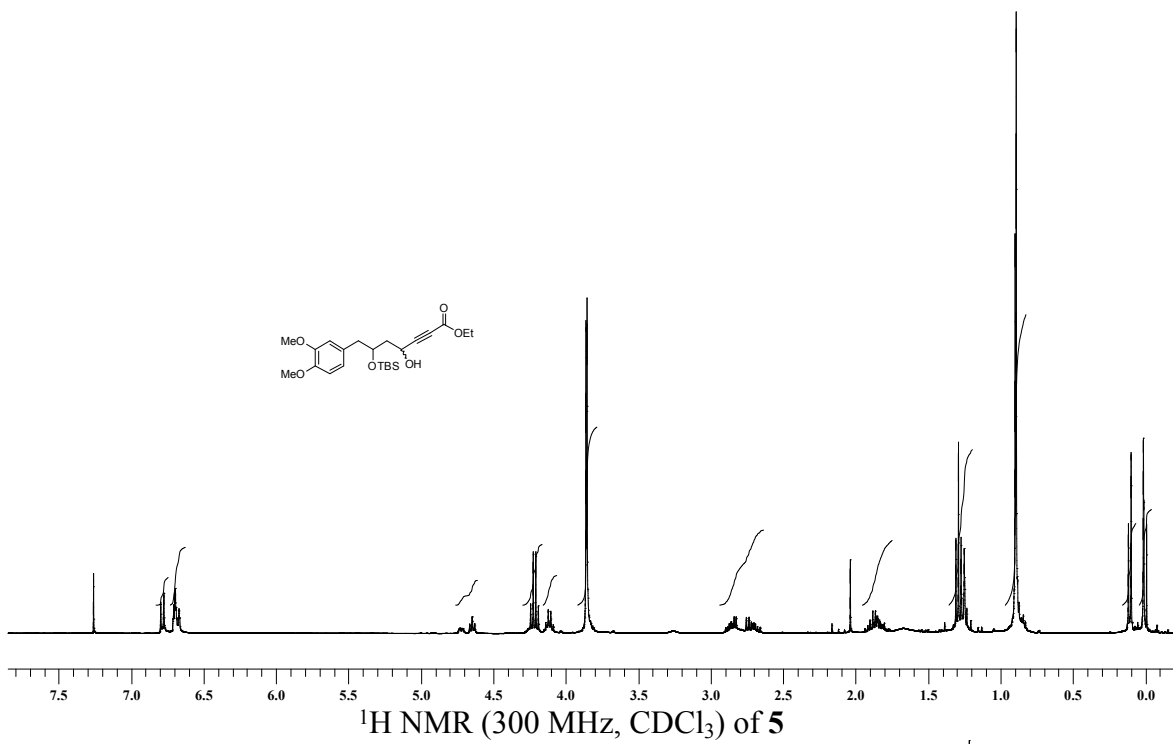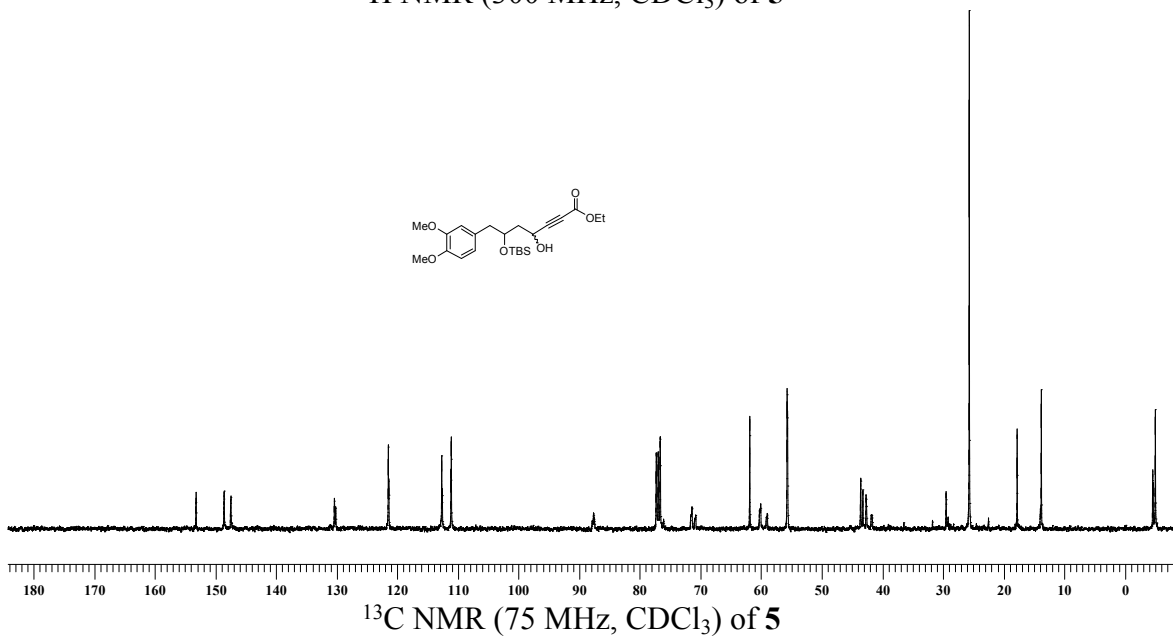

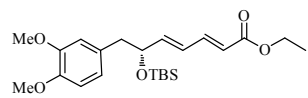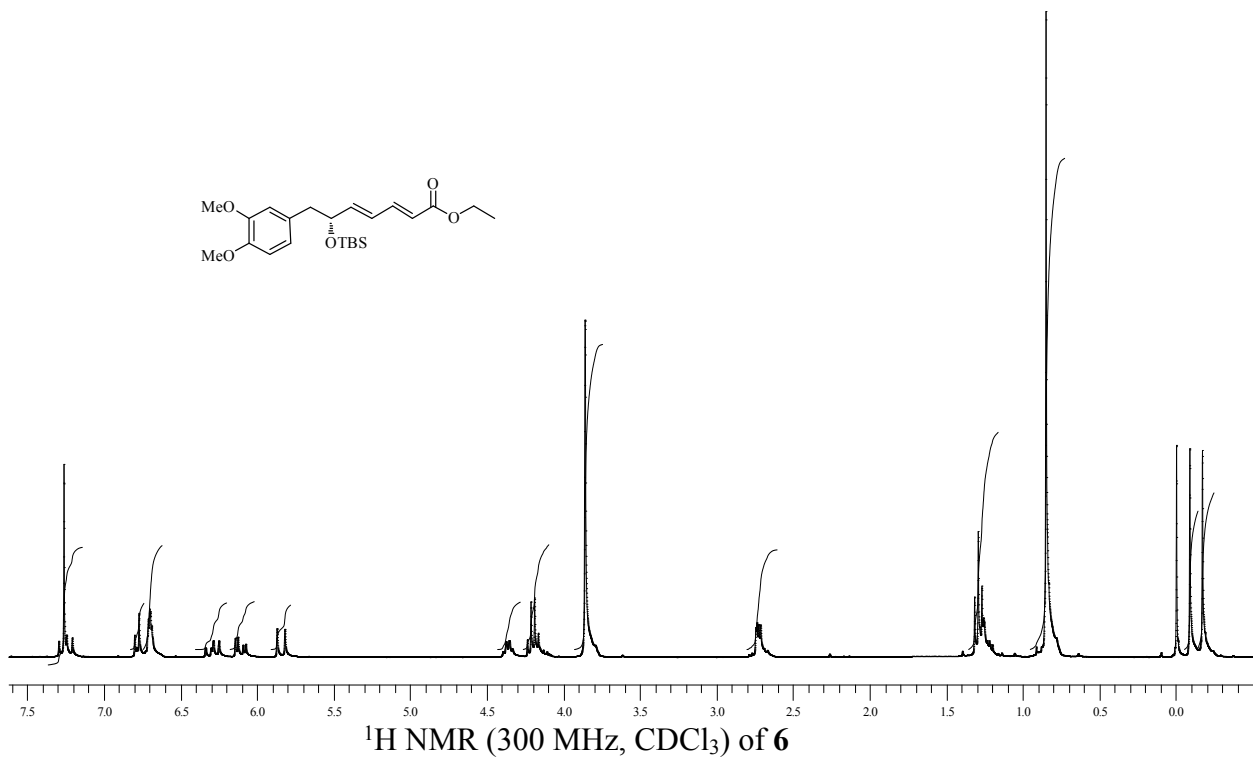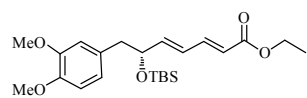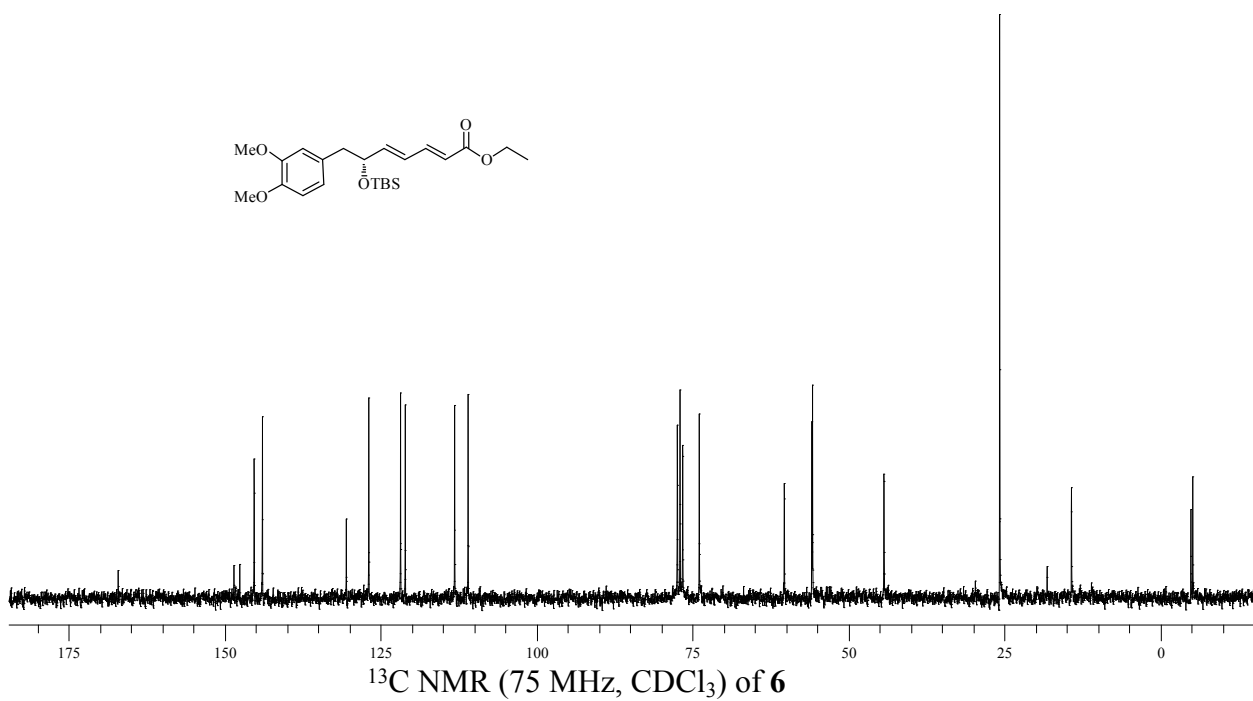

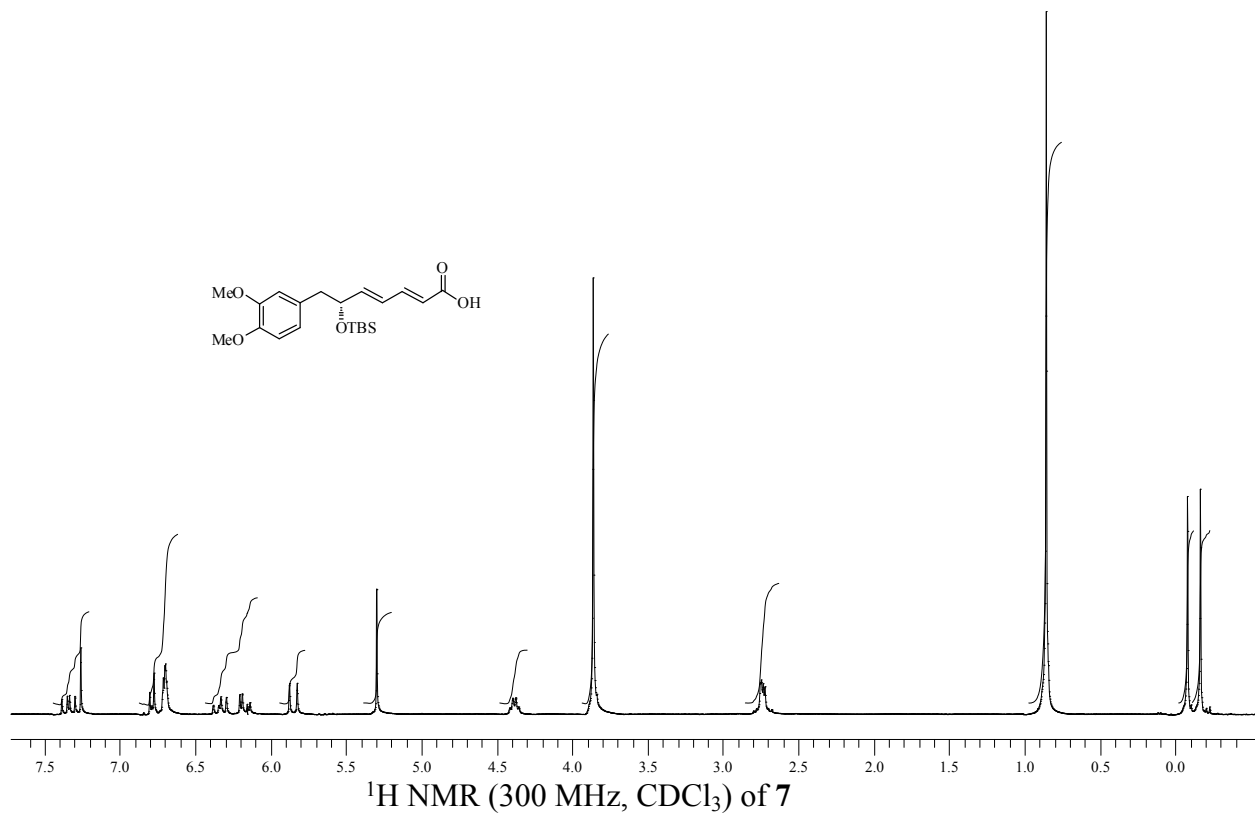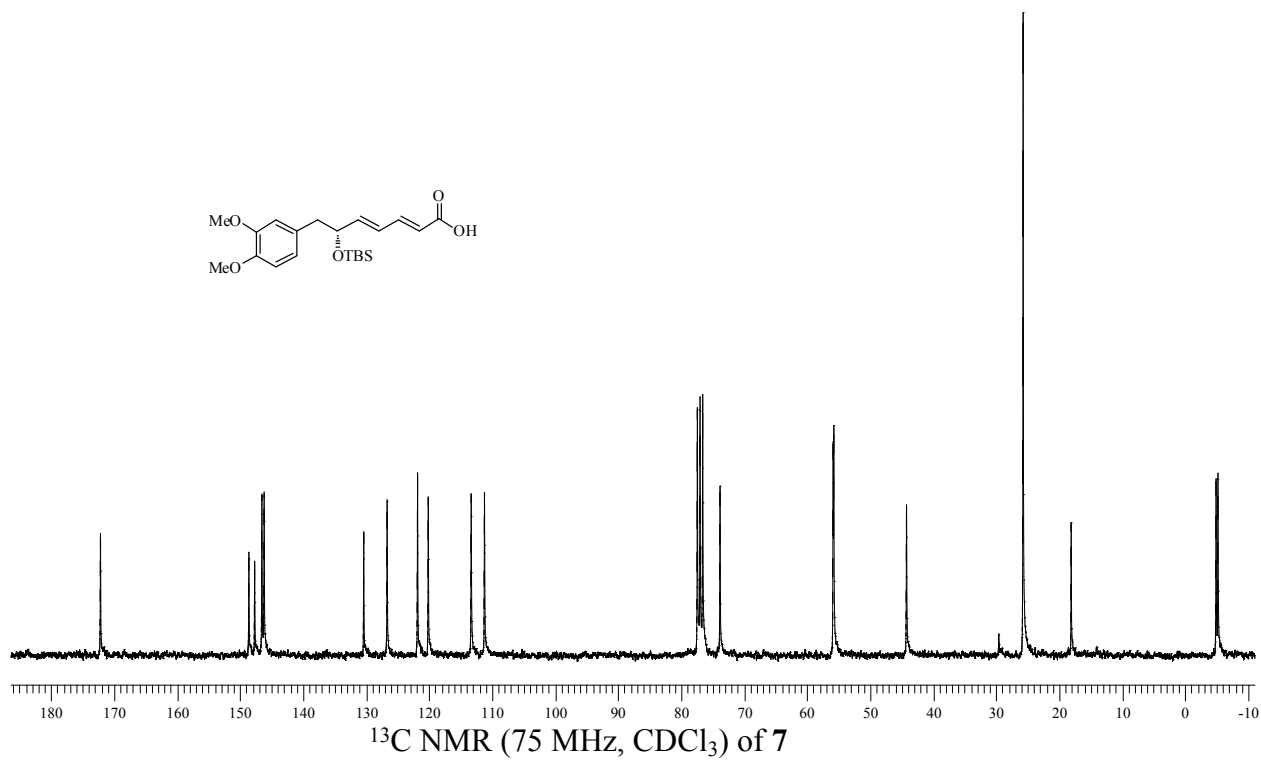

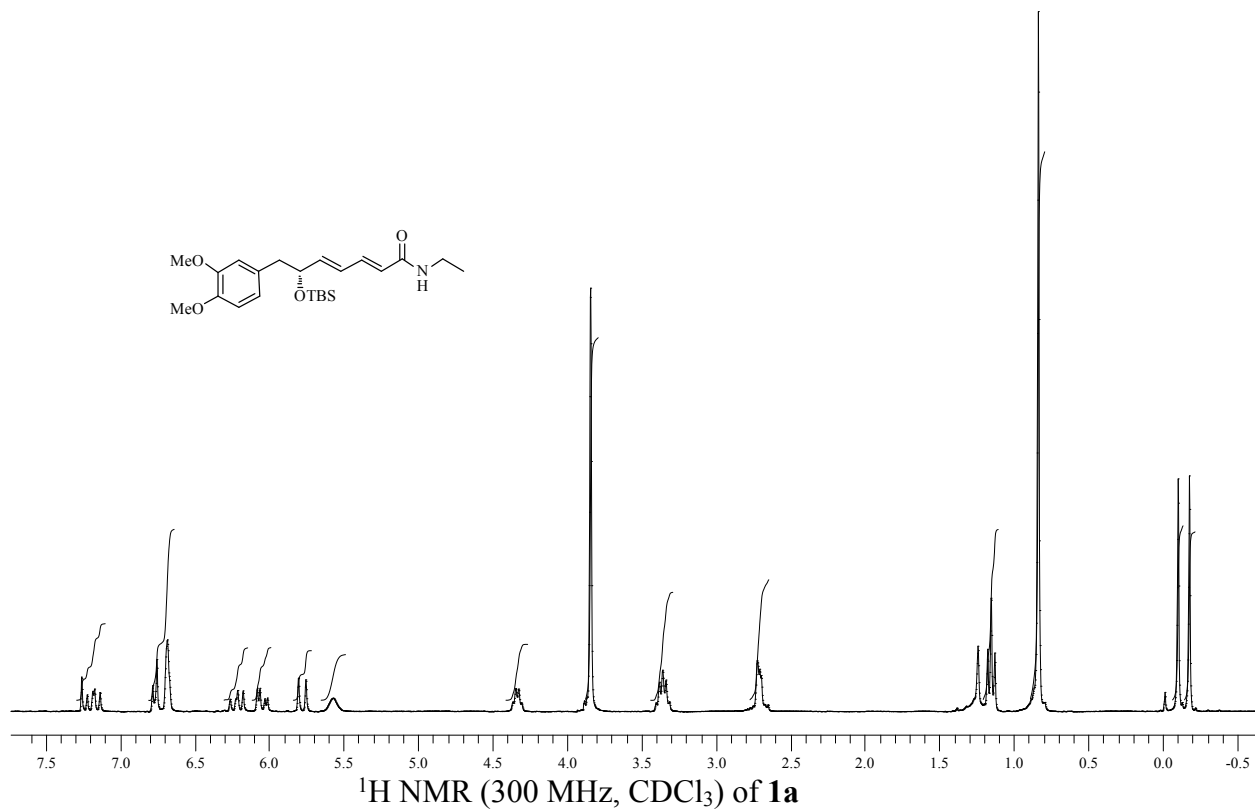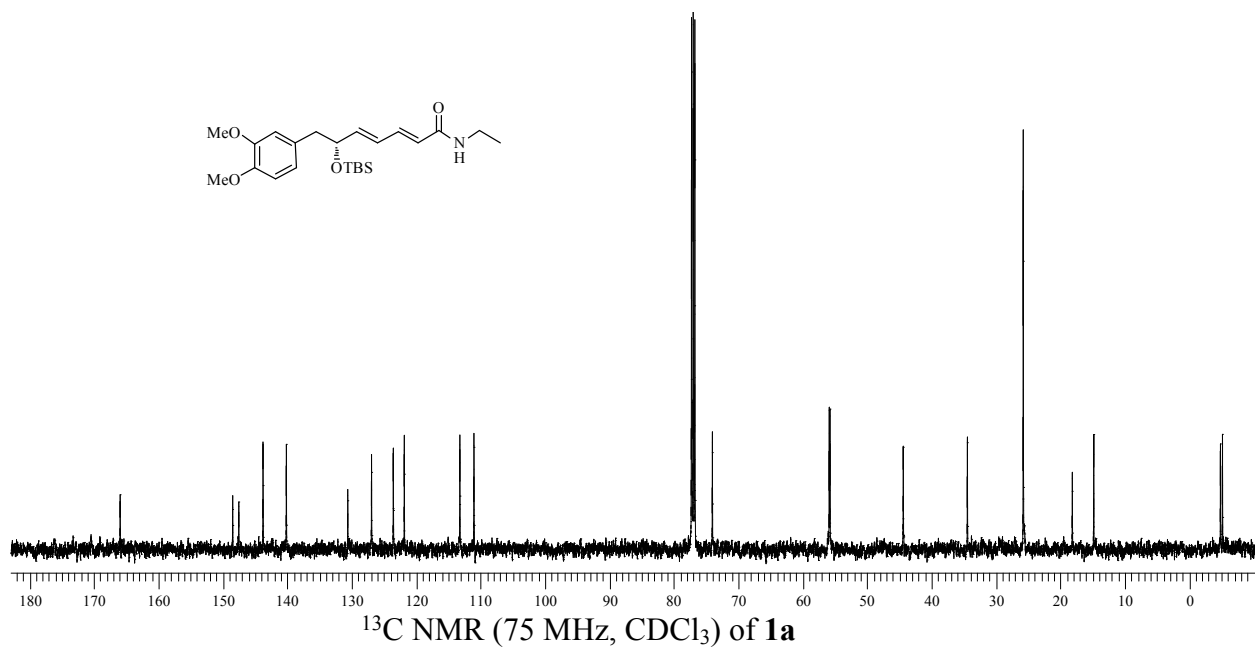

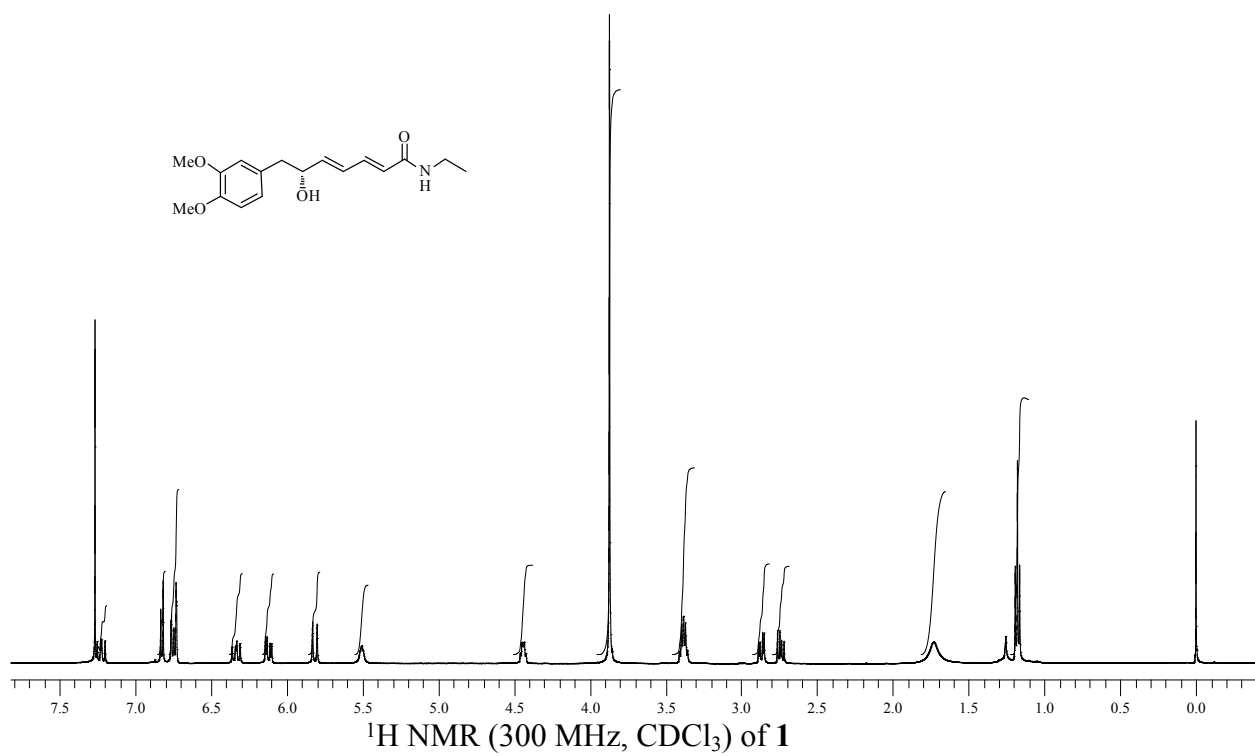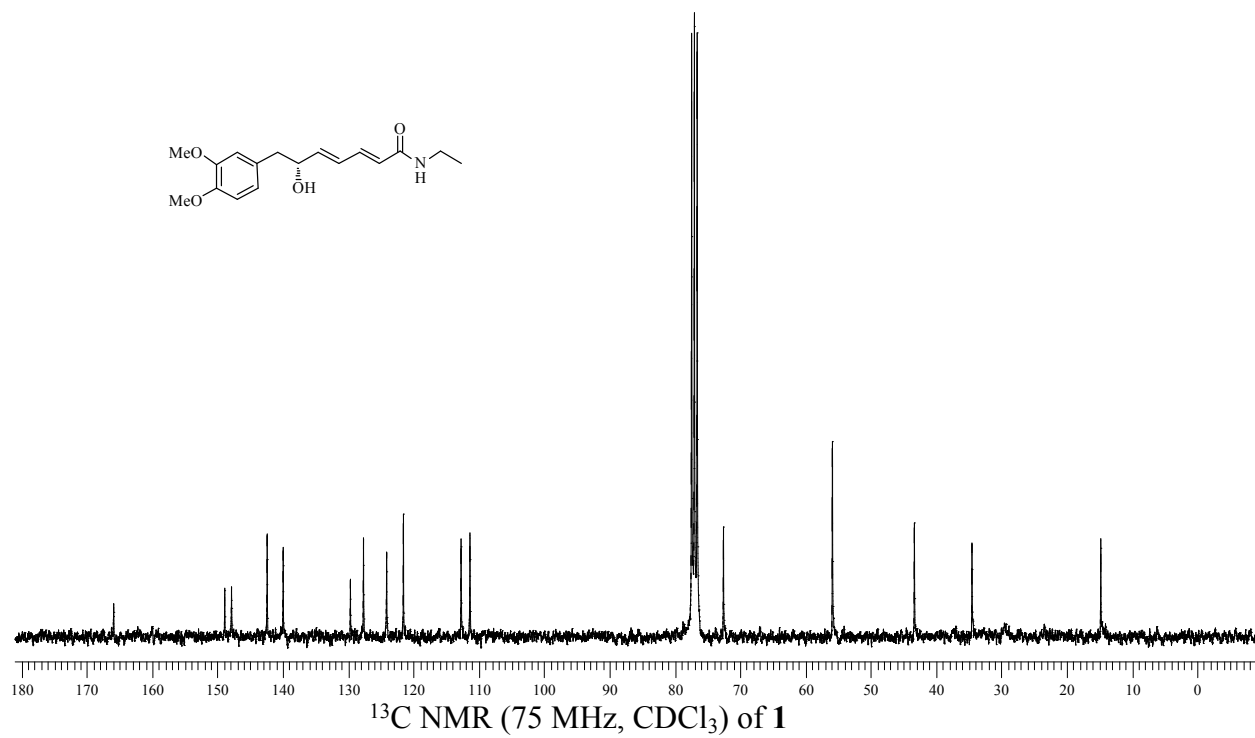

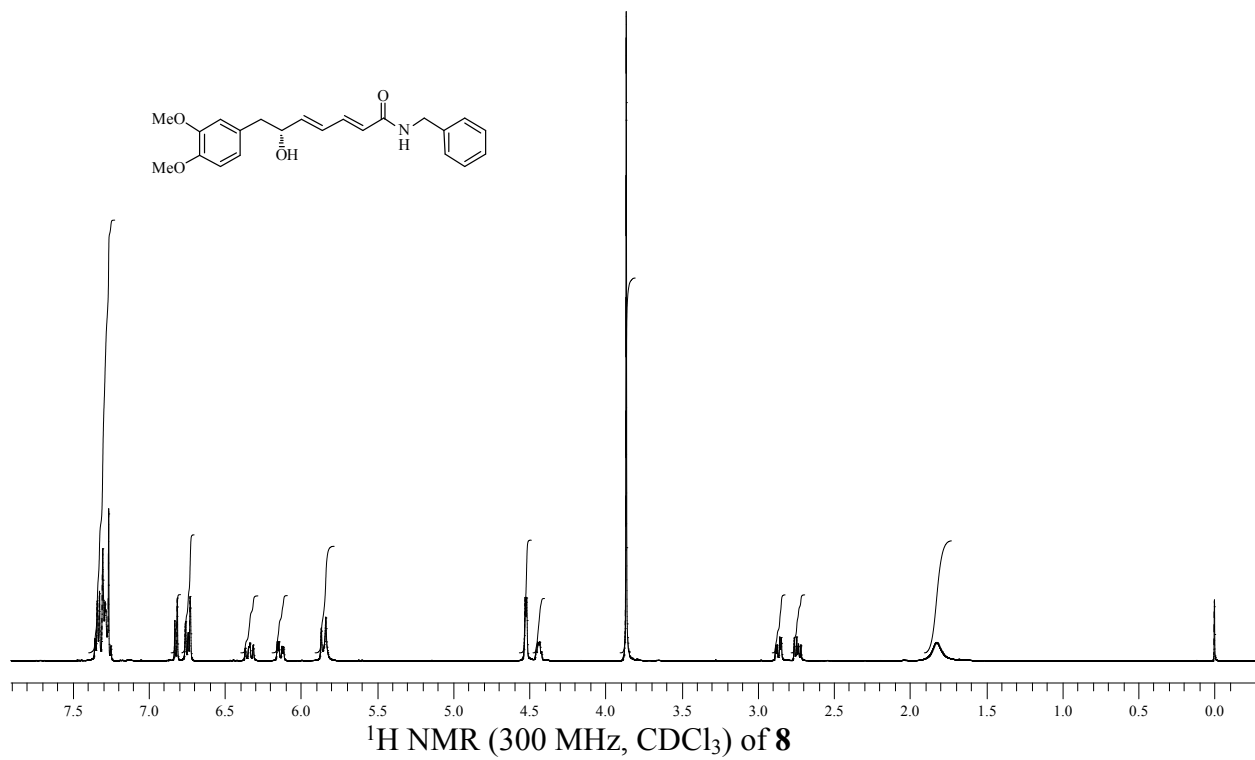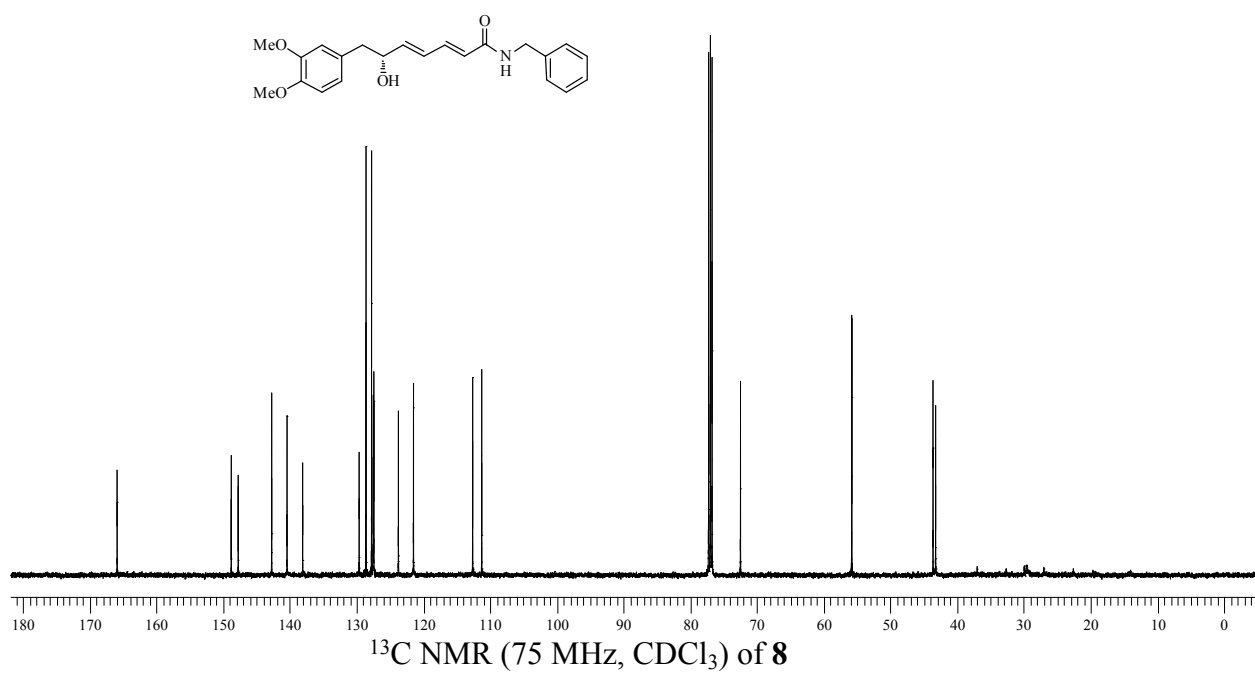

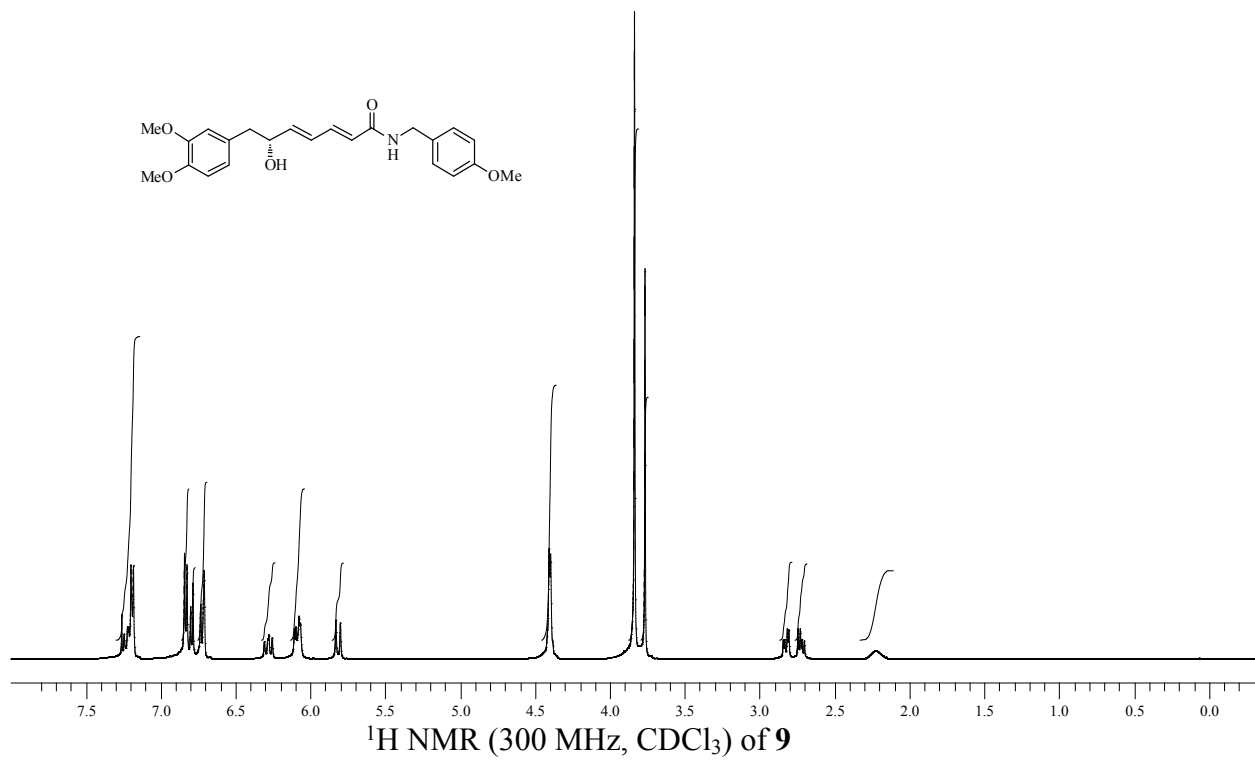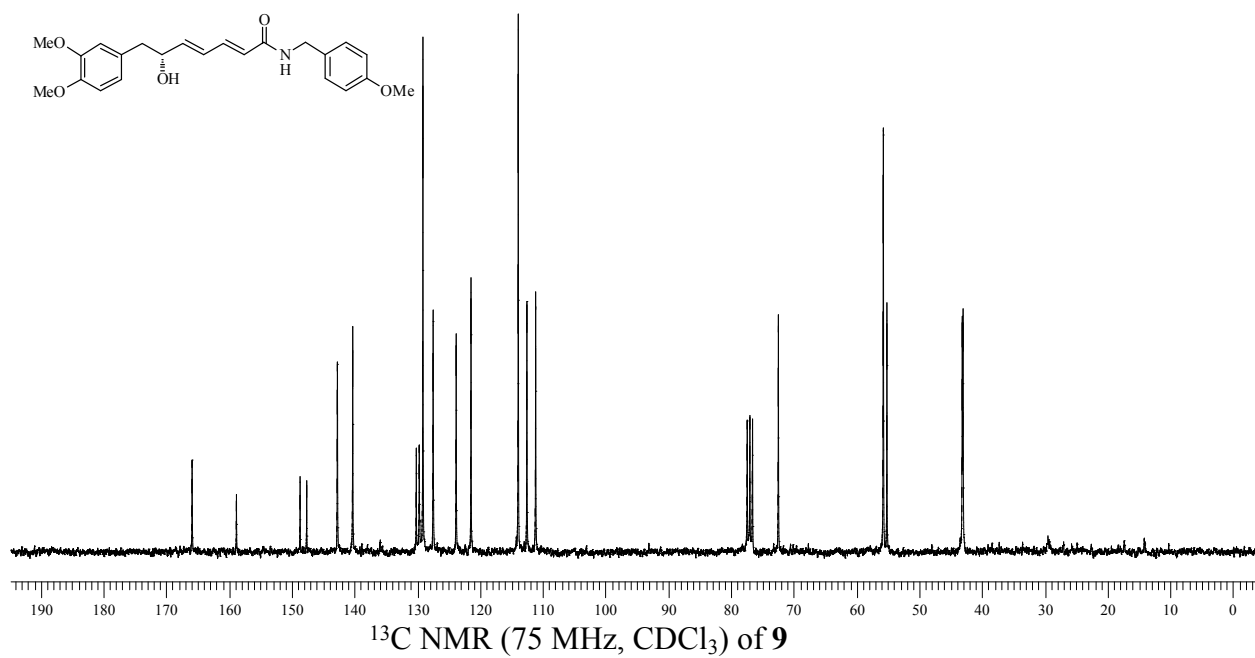



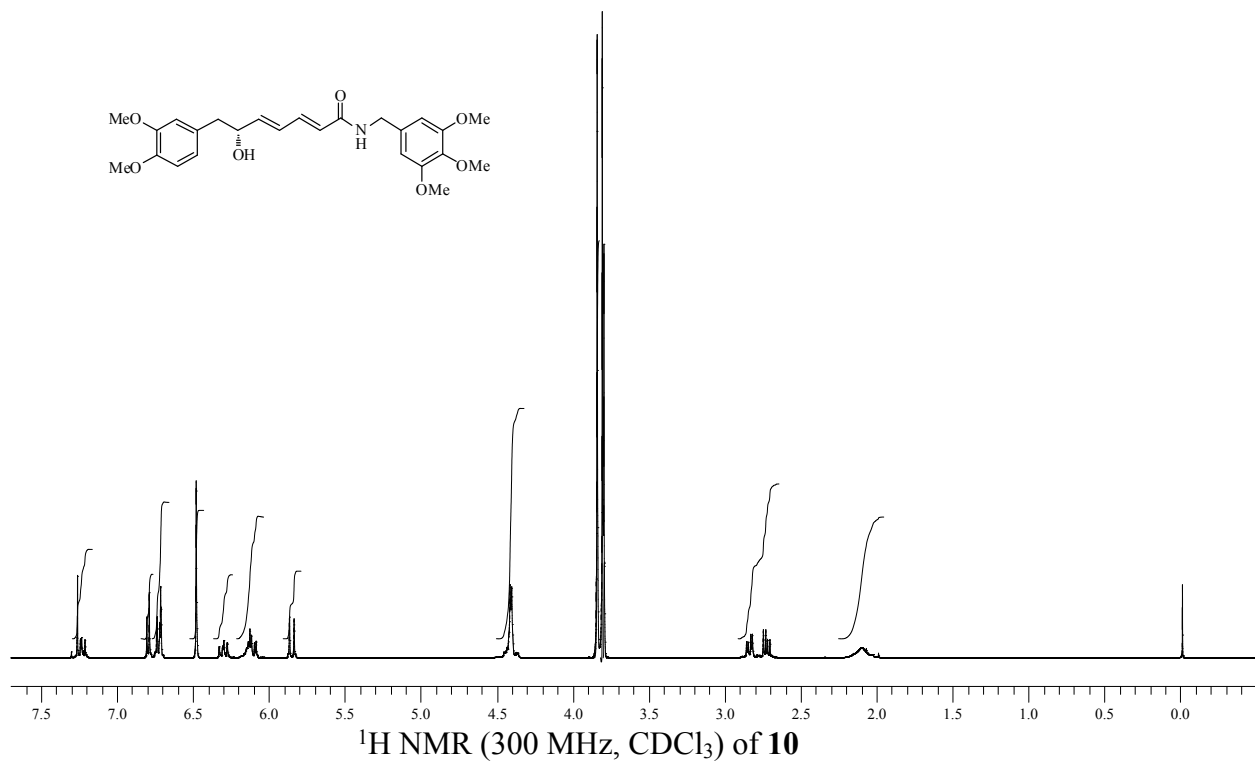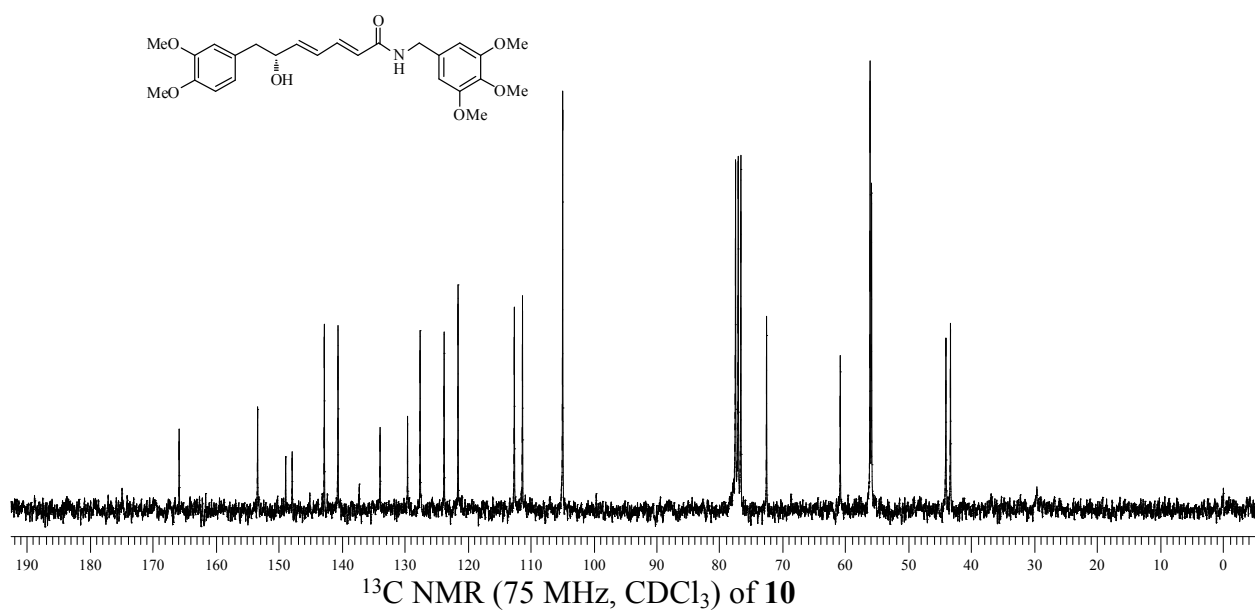

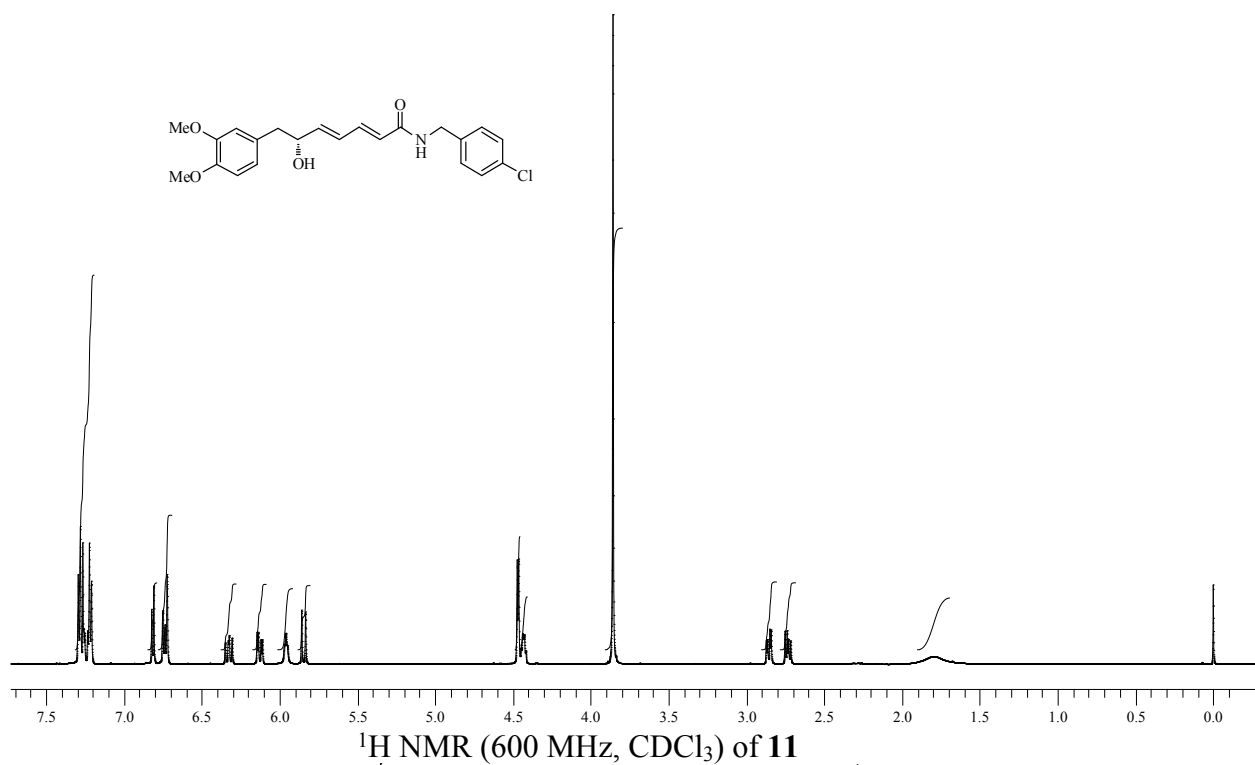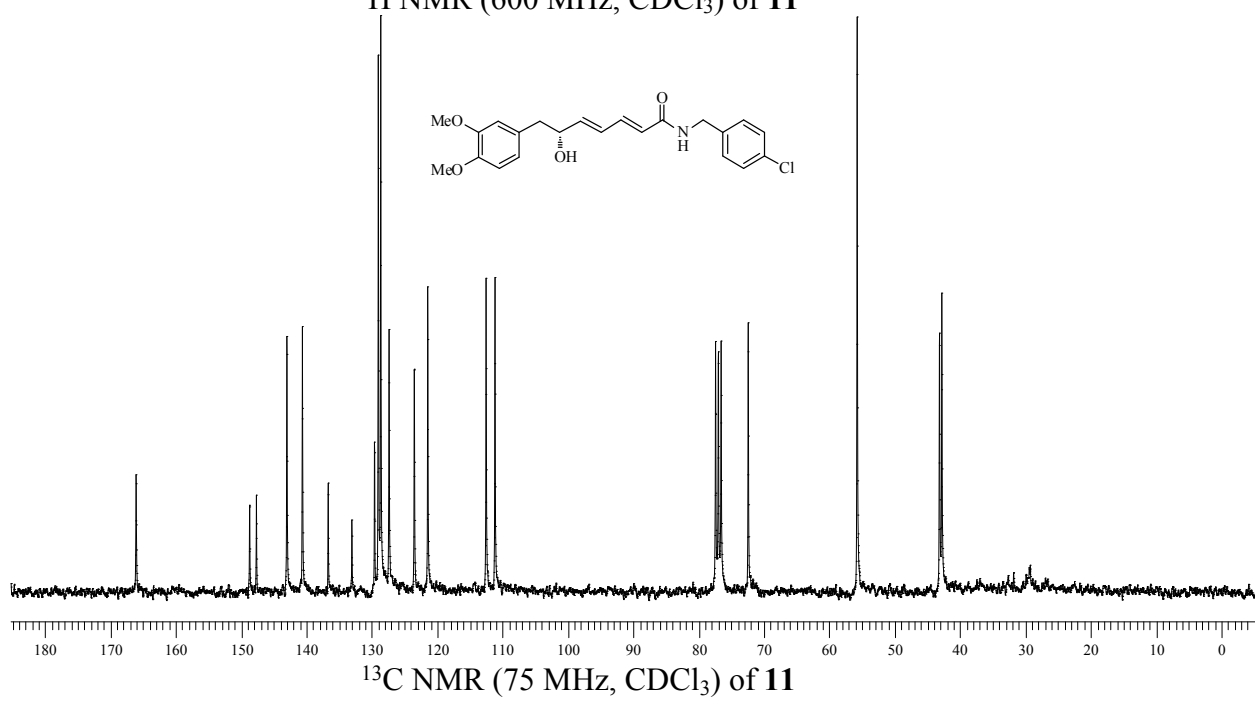

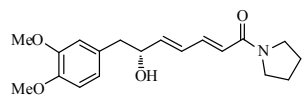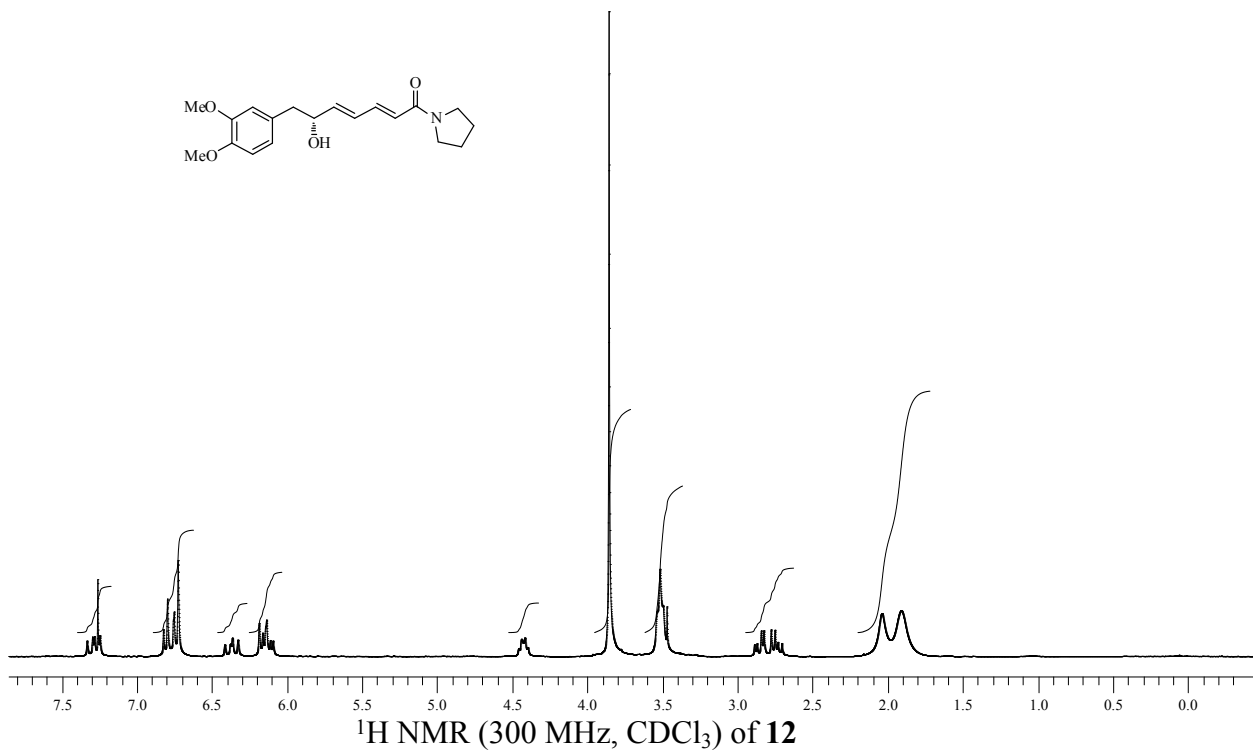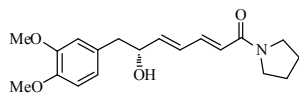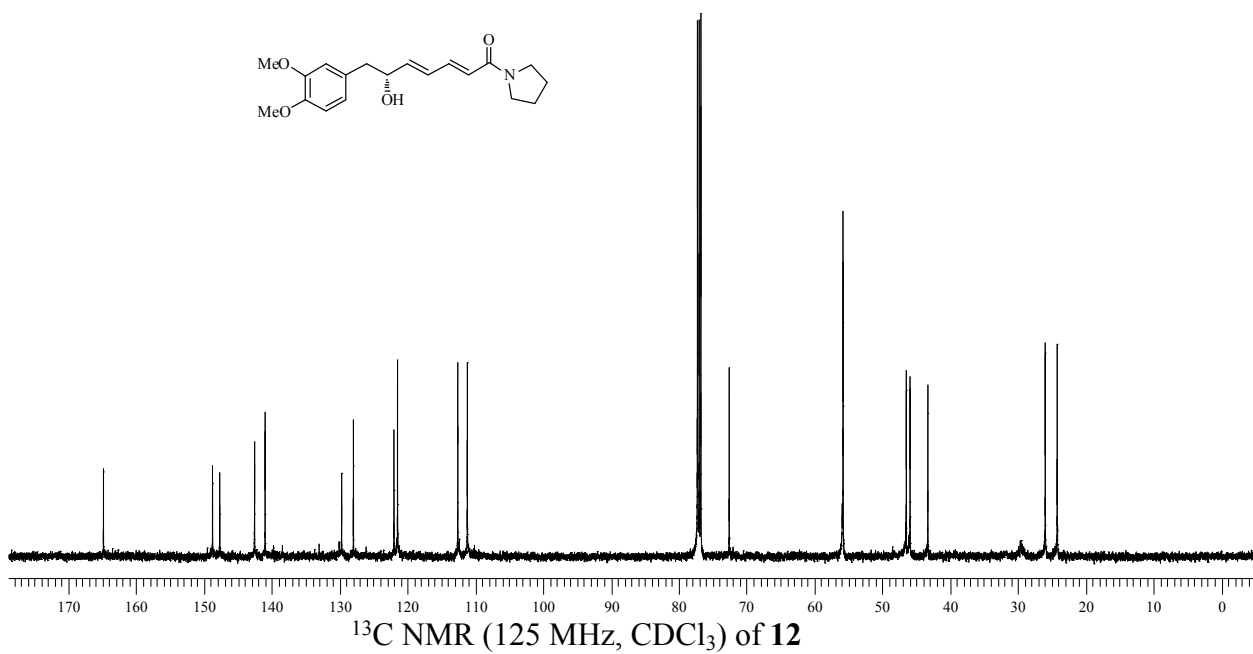

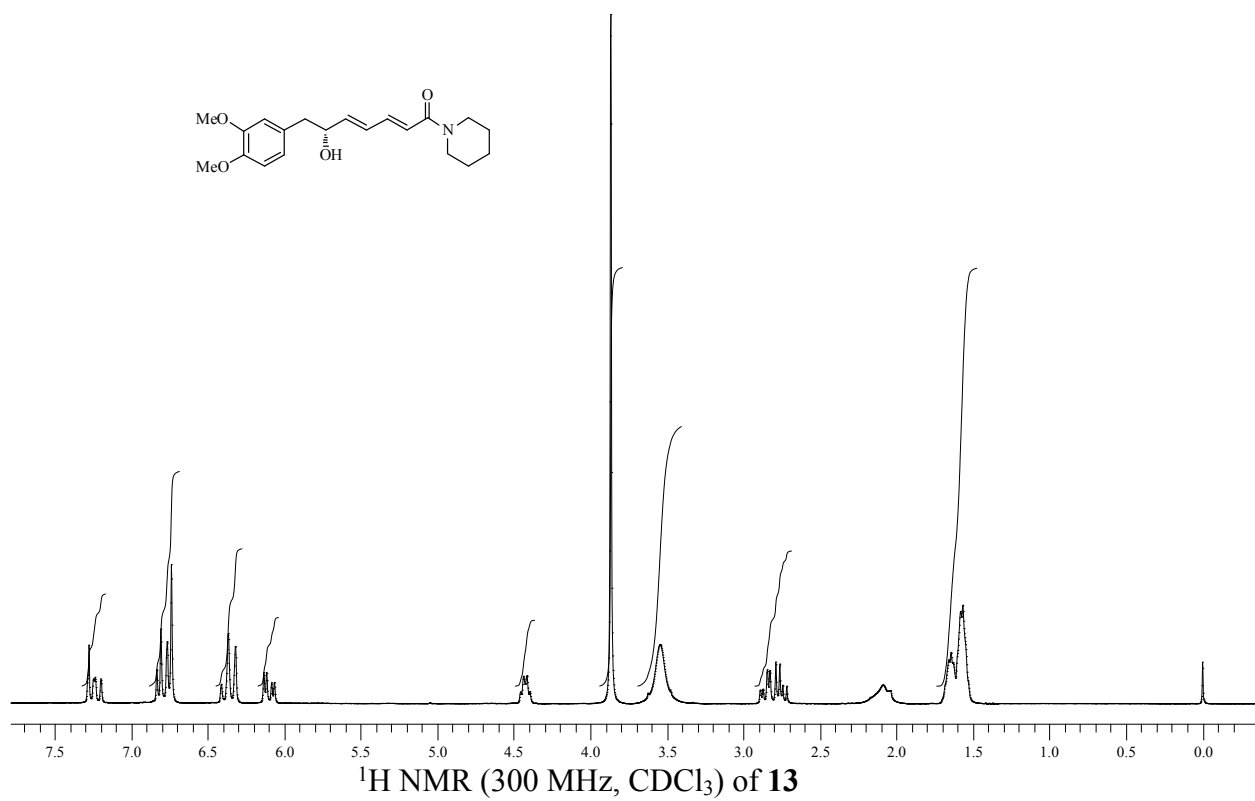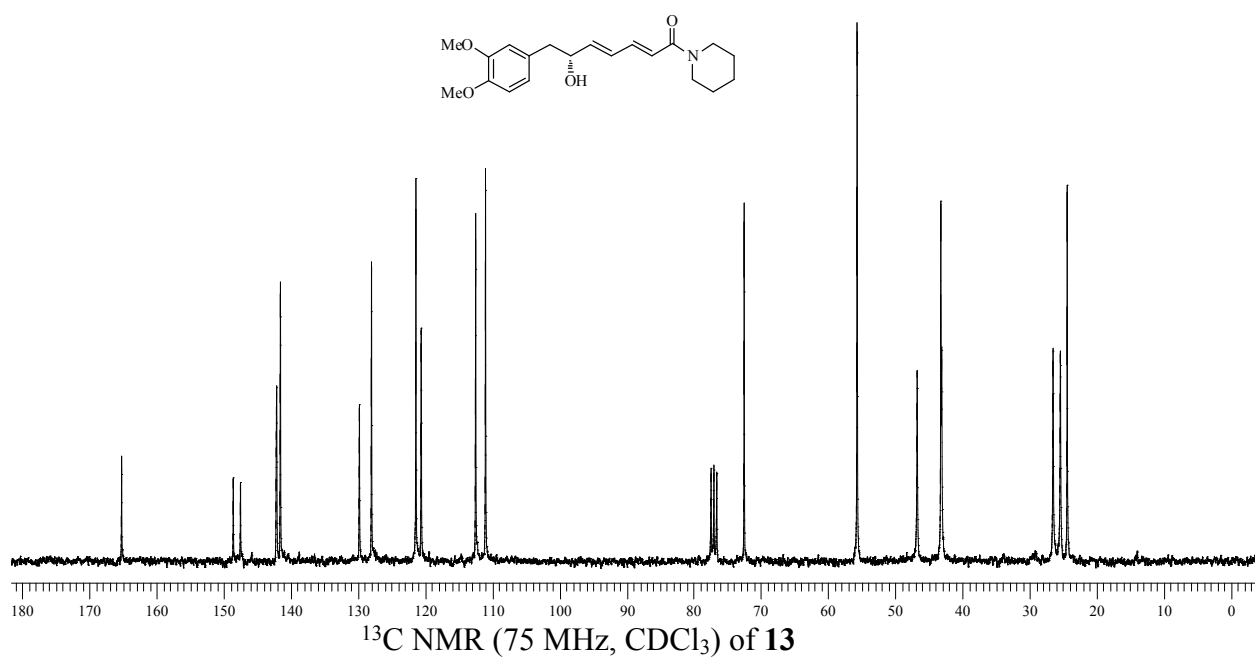

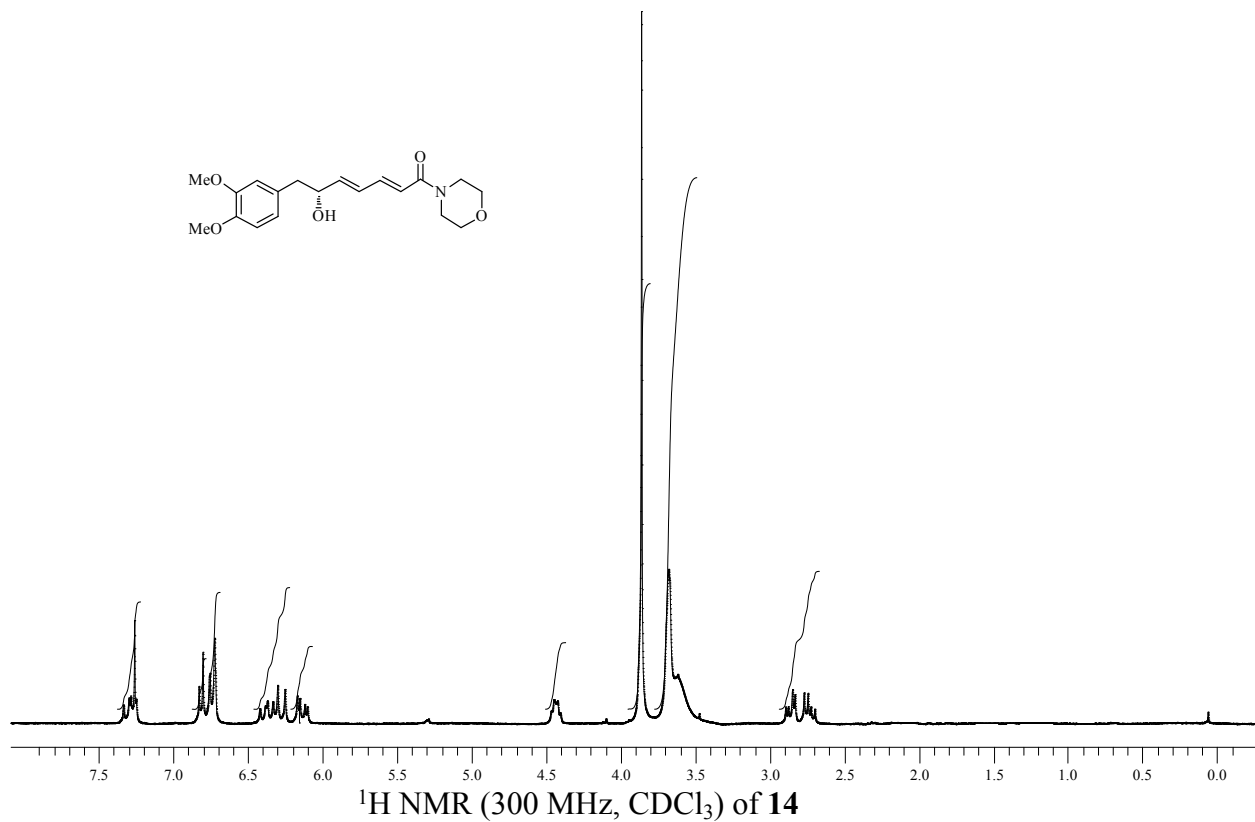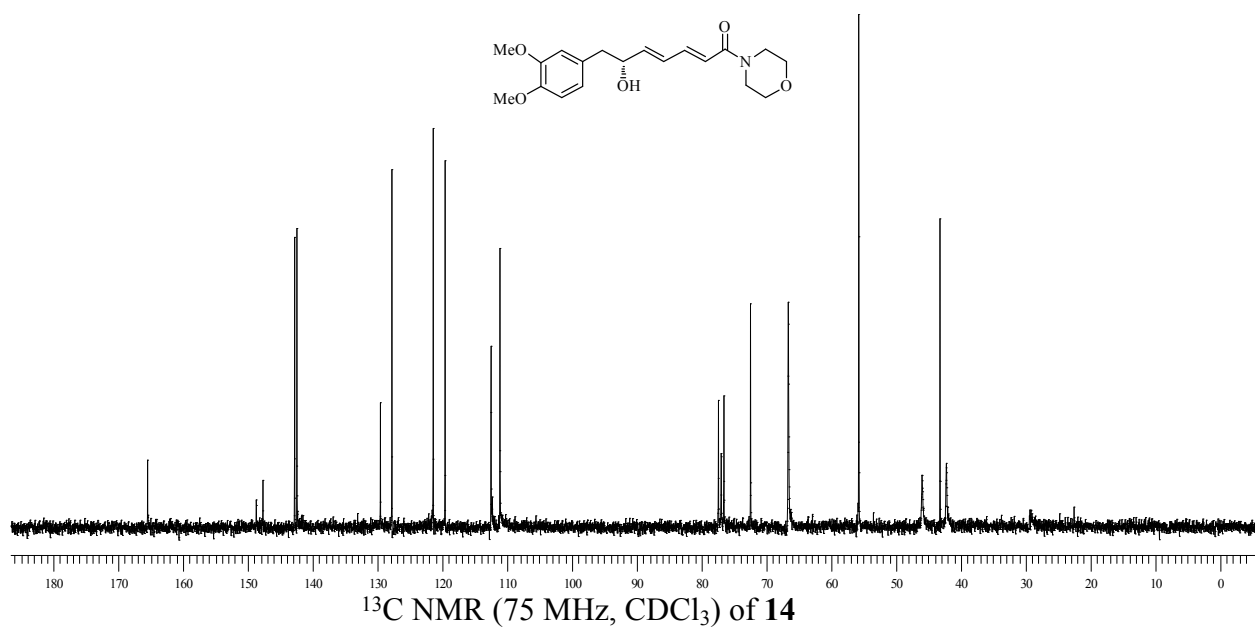

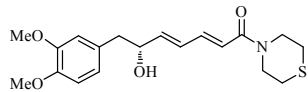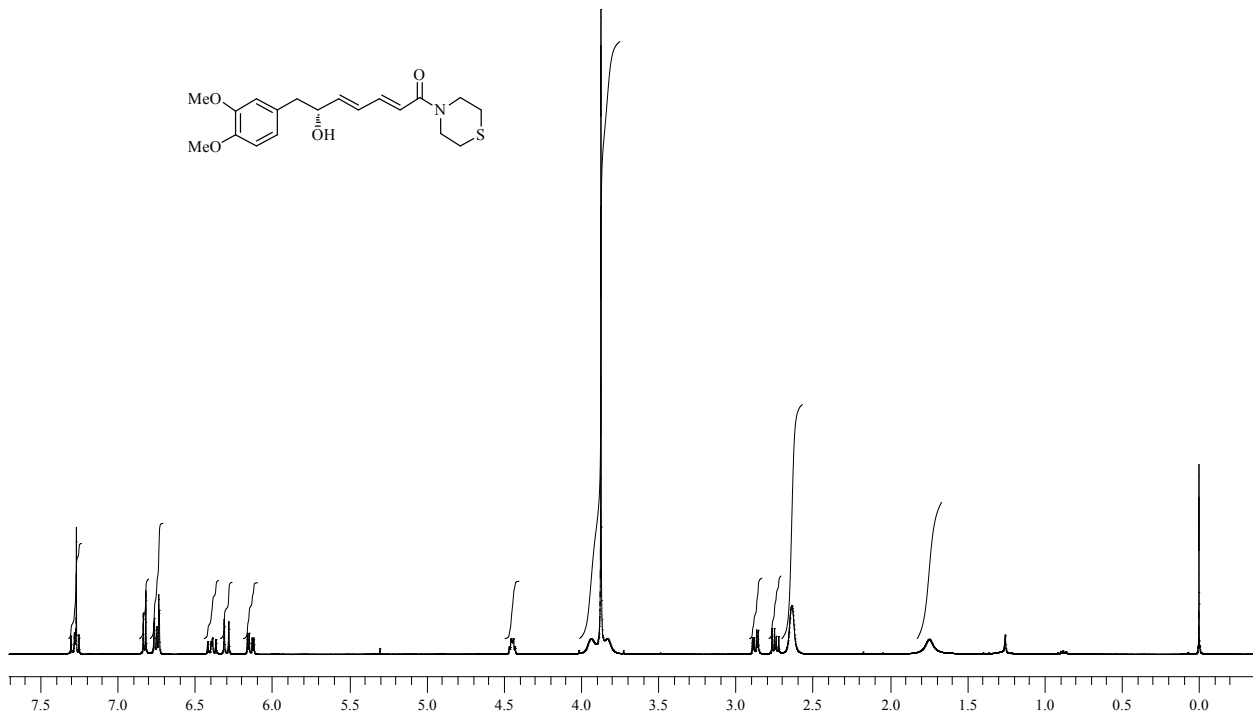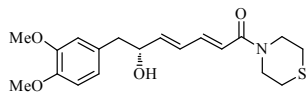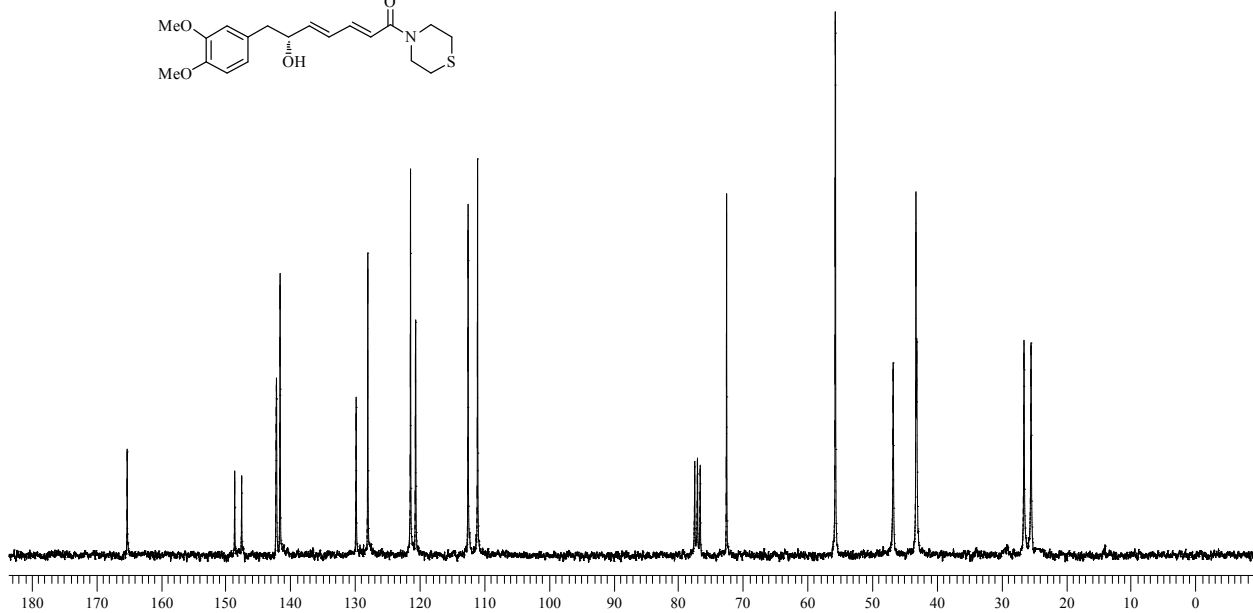

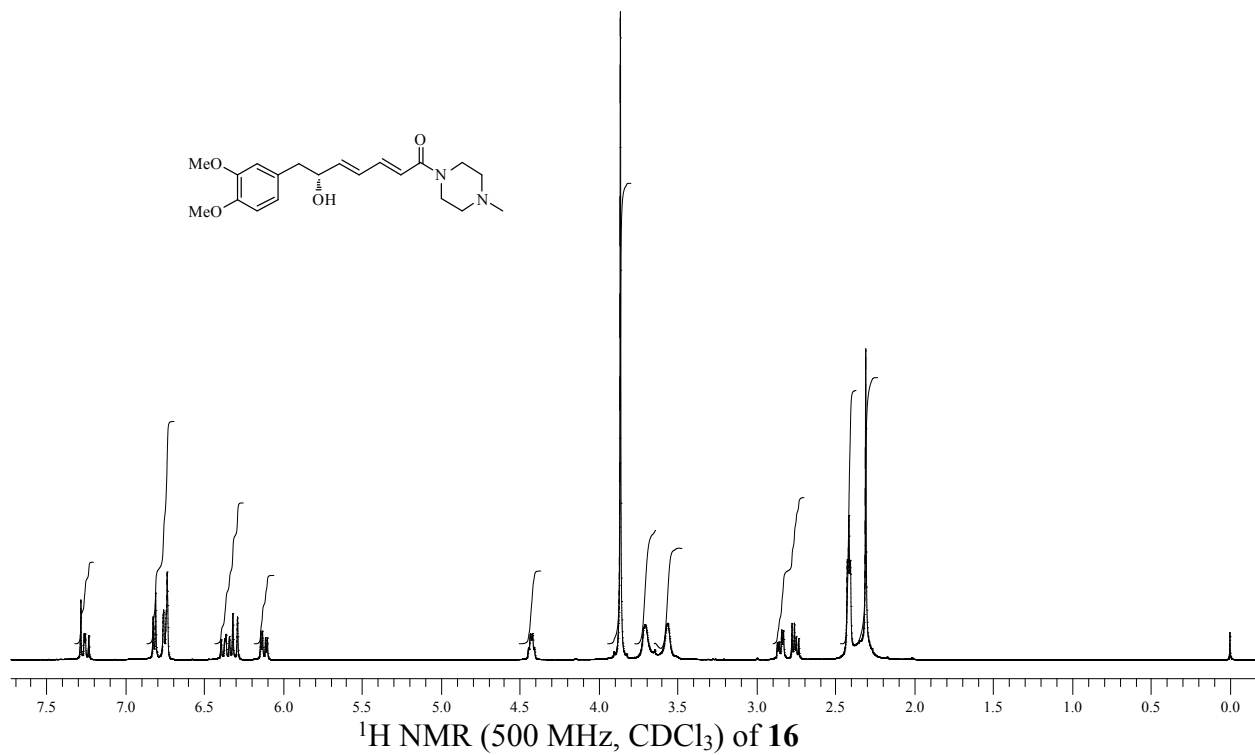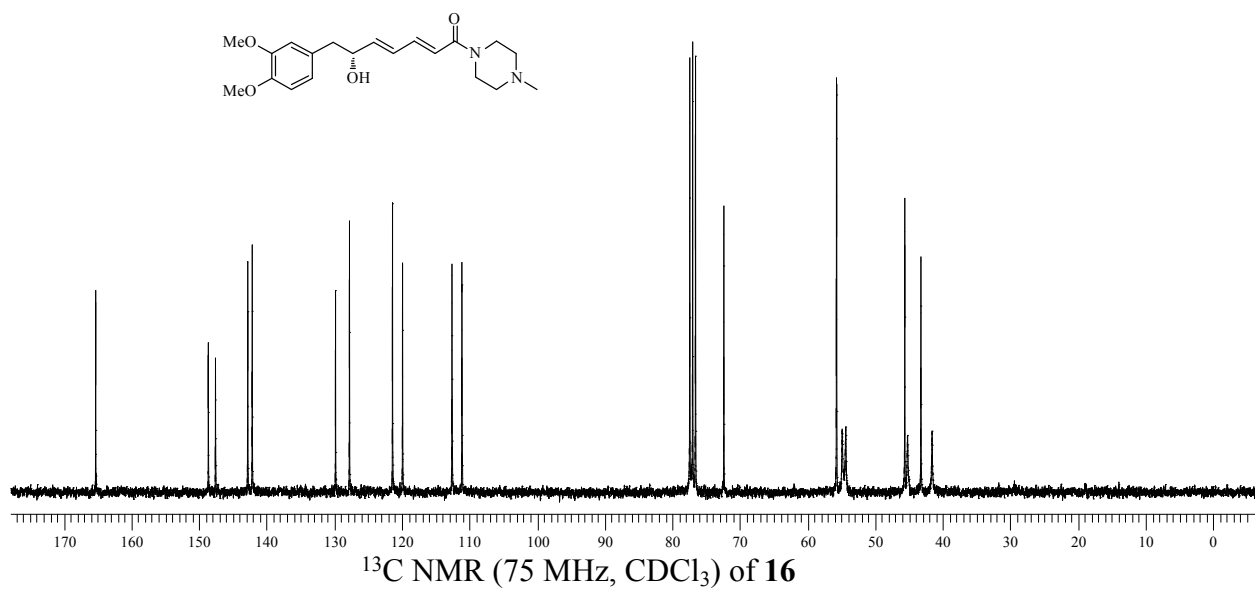

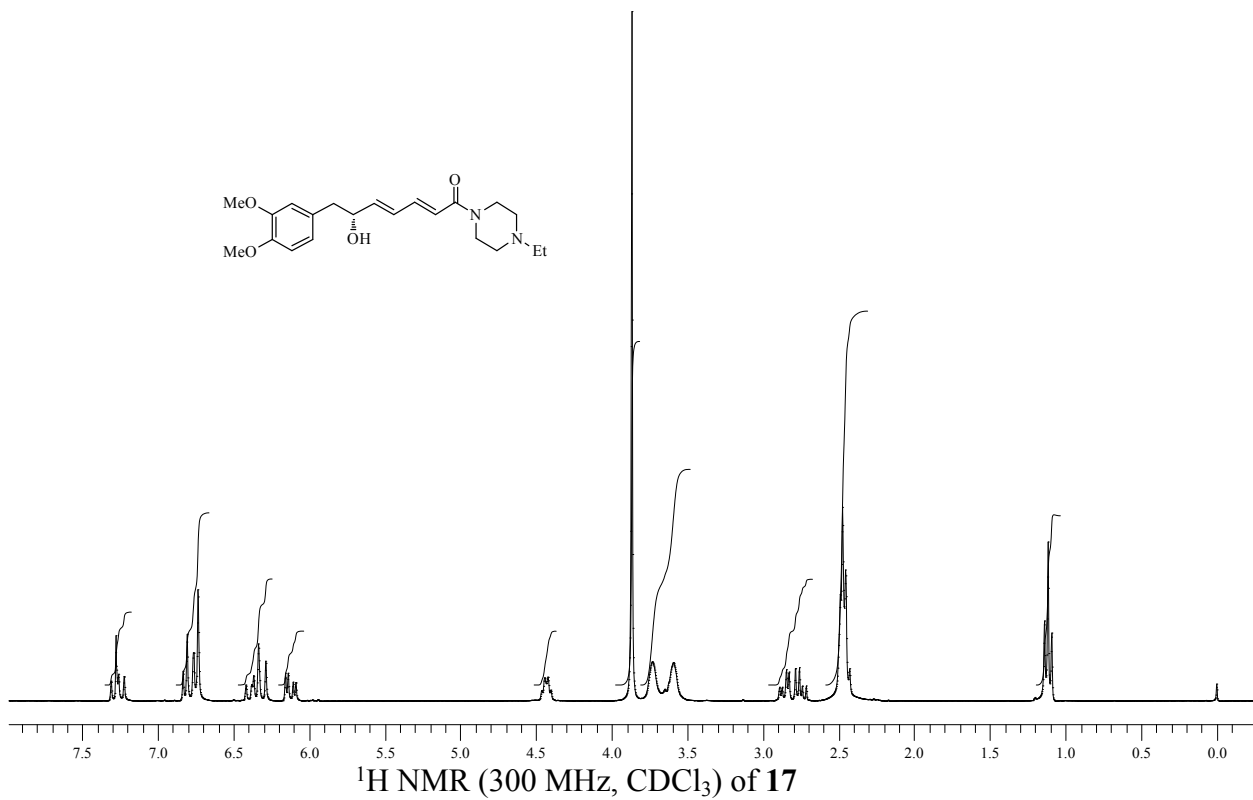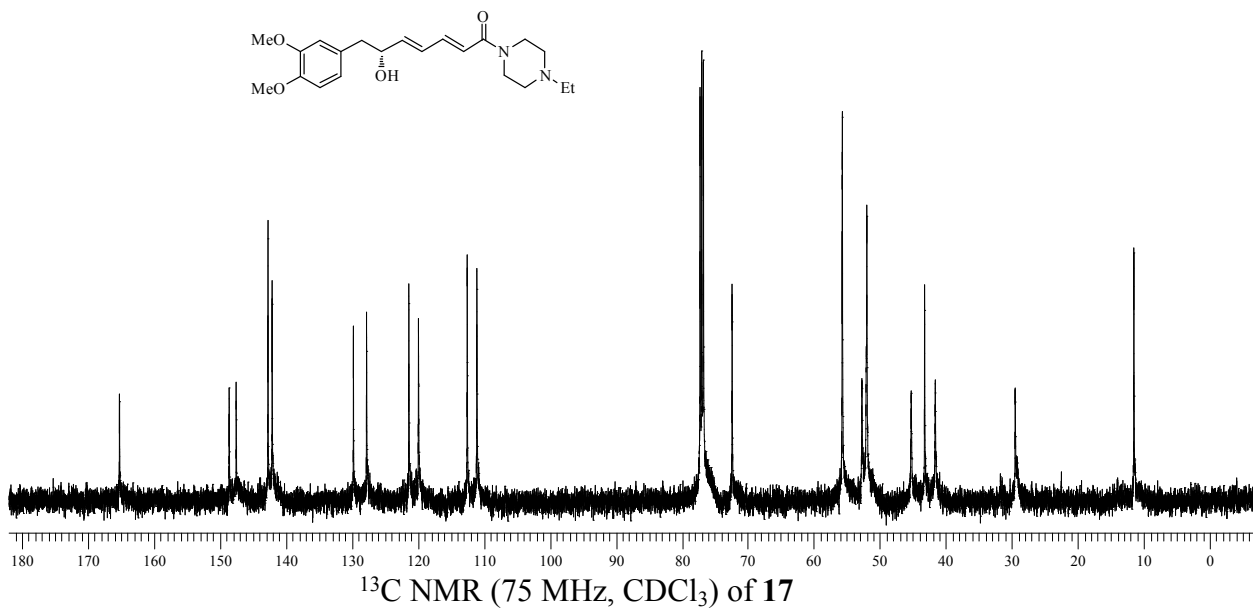



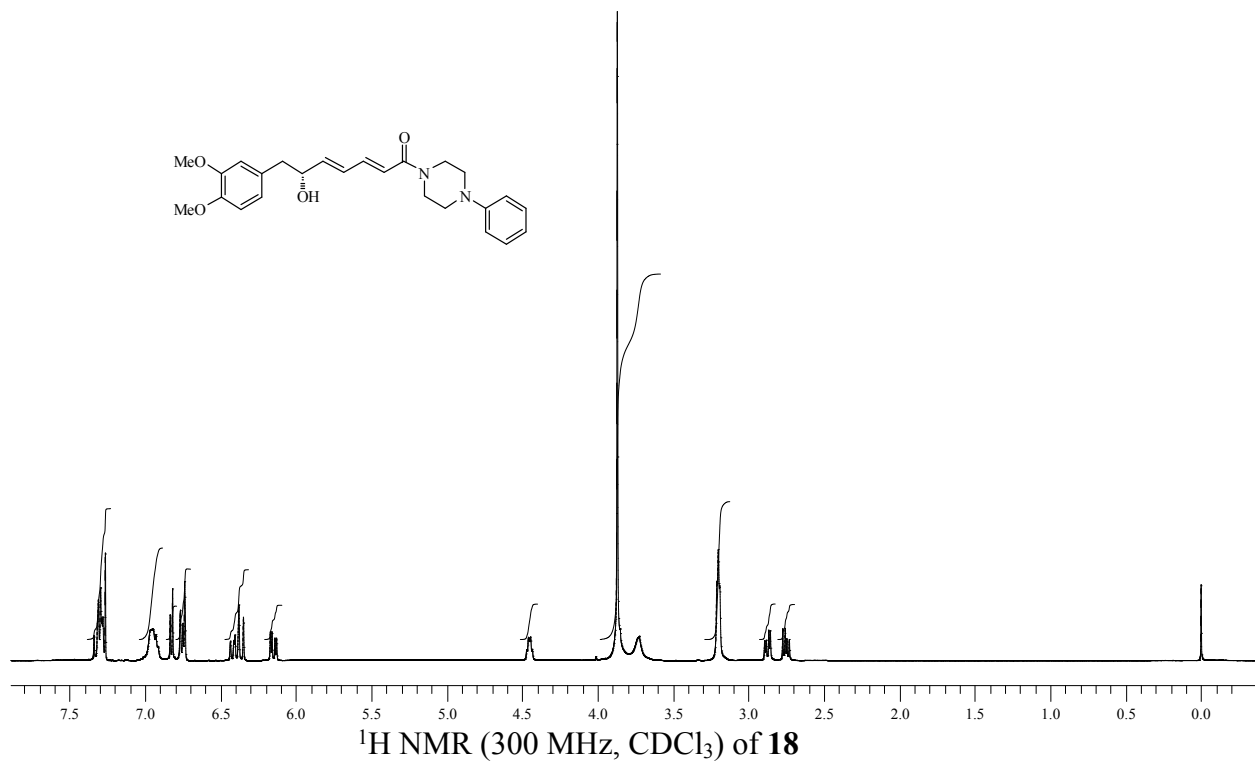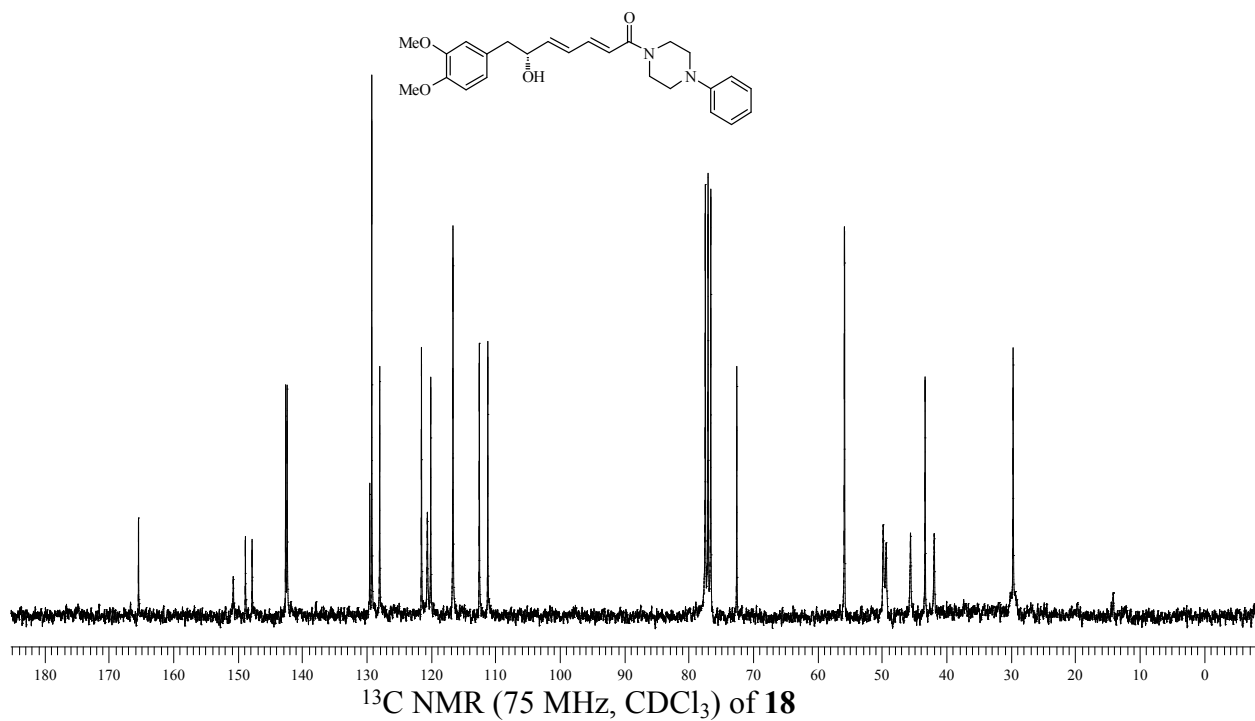

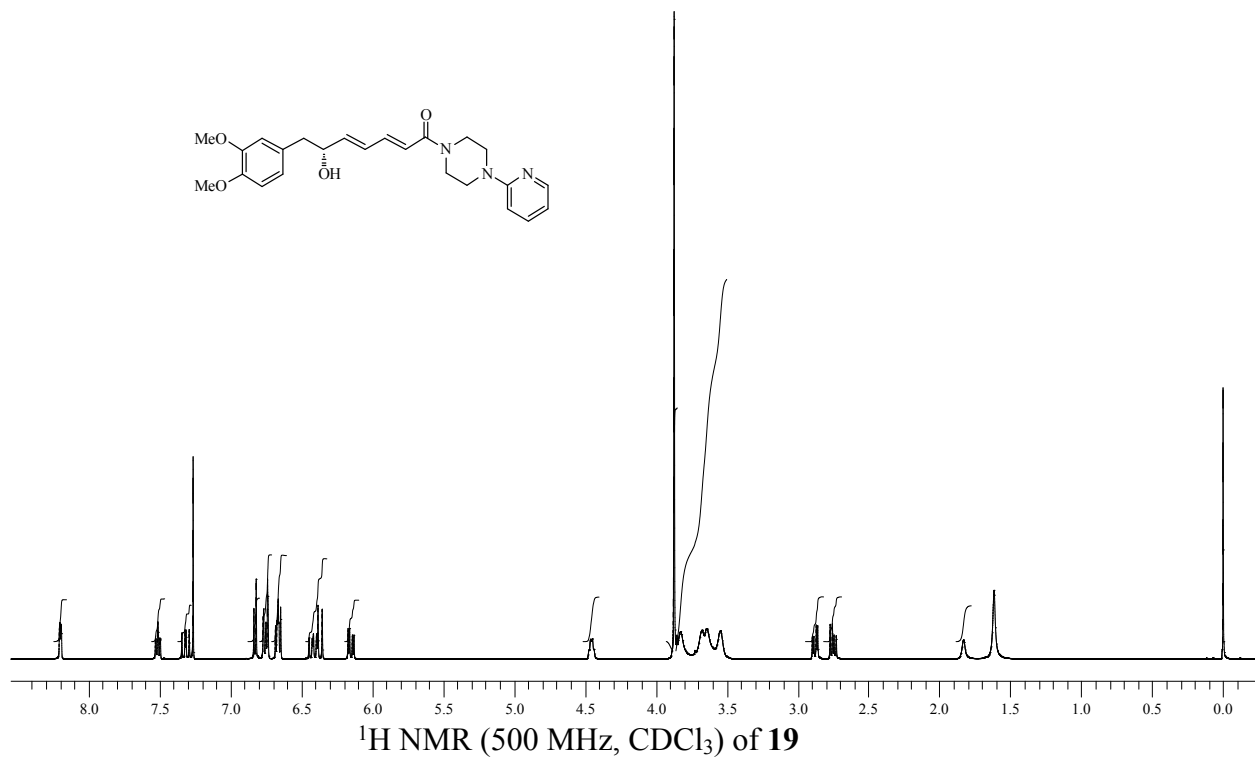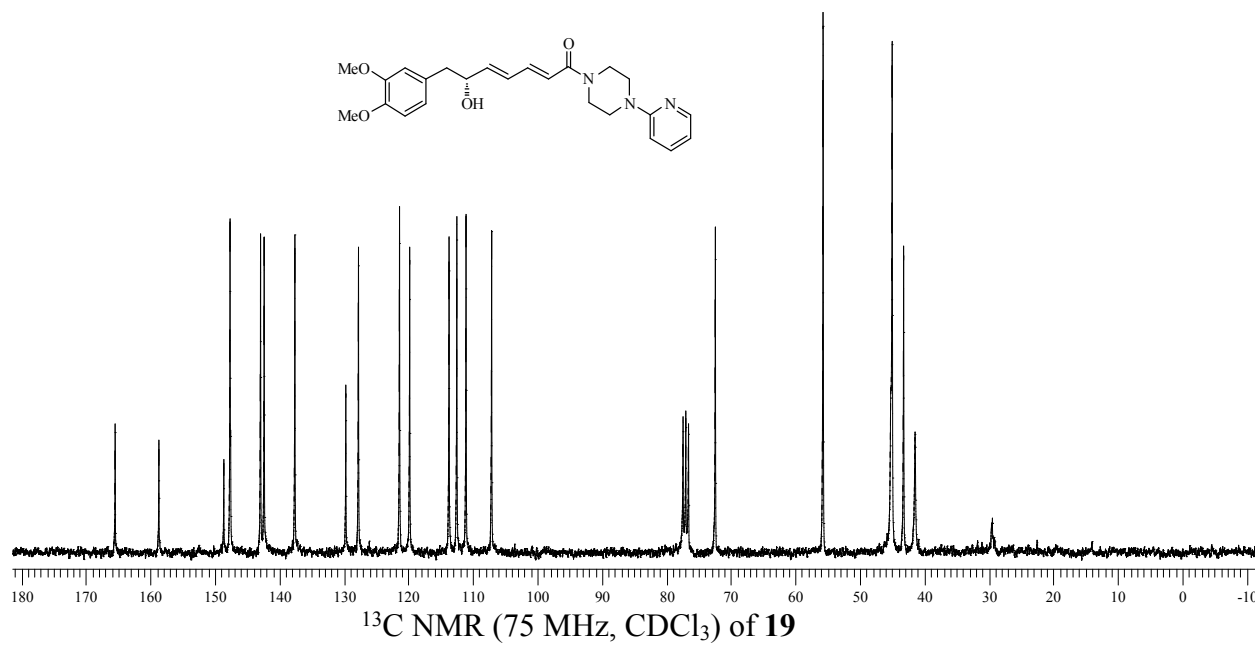

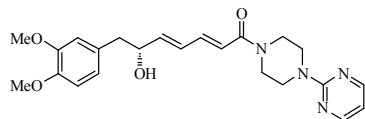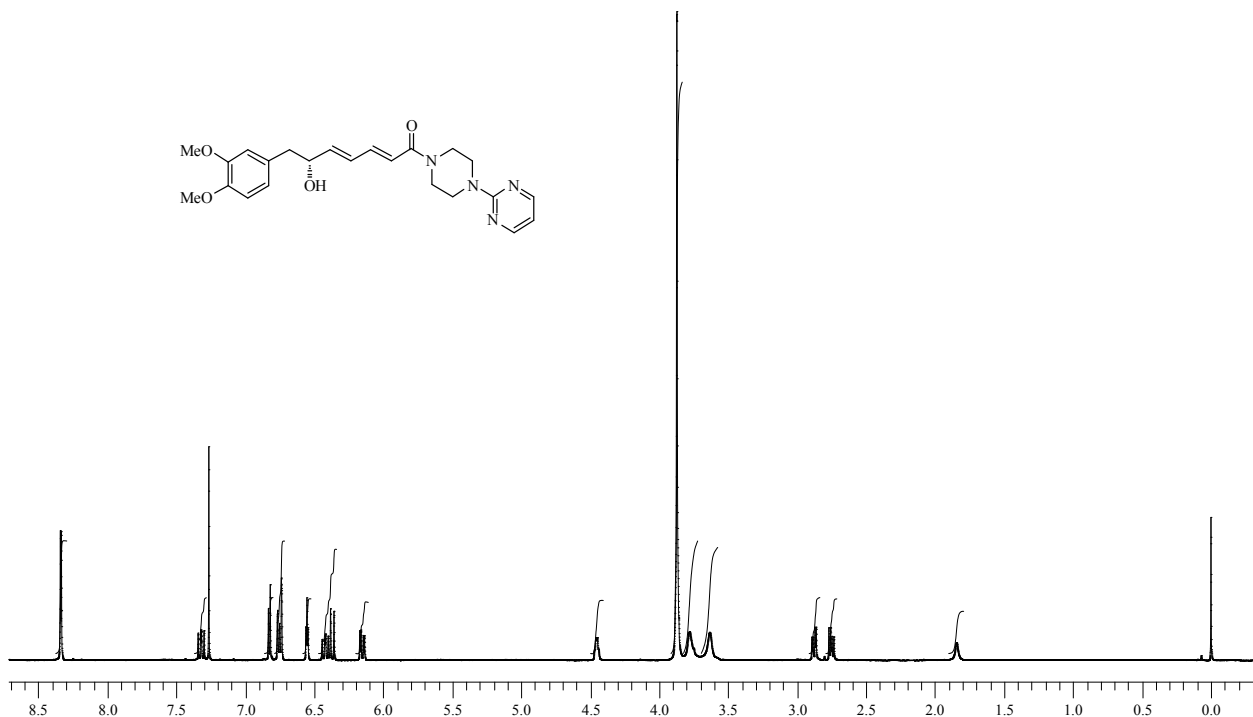

$^1\text{H}$  NMR (600 MHz,  $\text{CDCl}_3$ ) of **20**

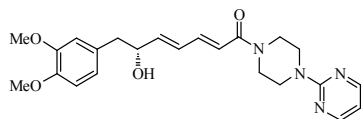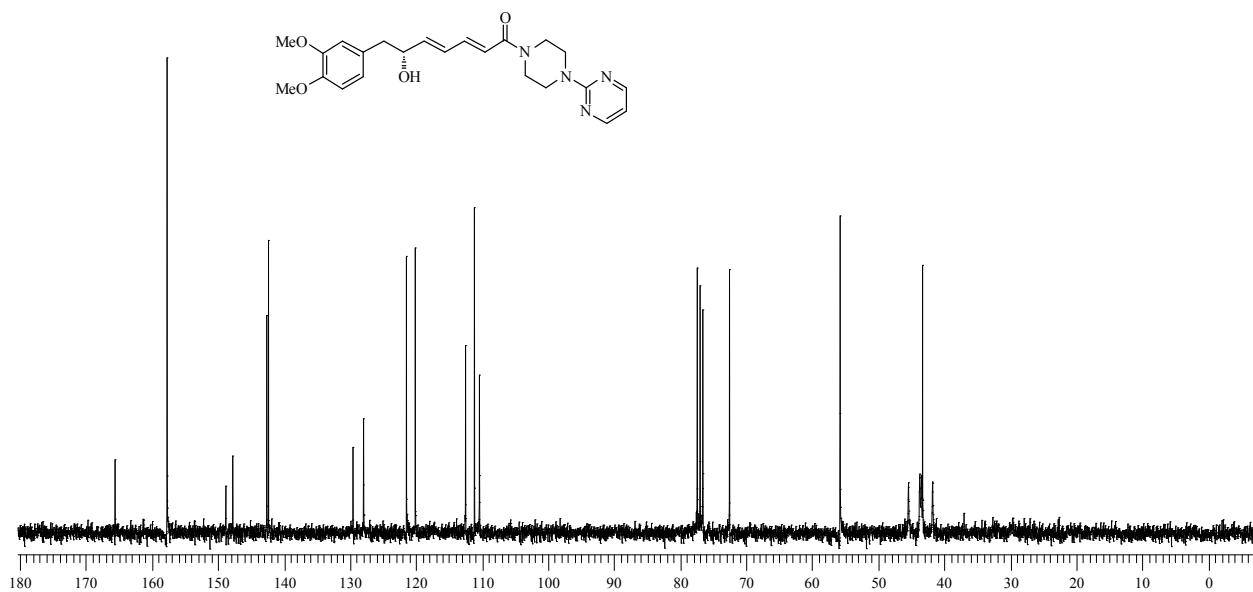

$^{13}\text{C}$  NMR (75 MHz,  $\text{CDCl}_3$ ) of **20**

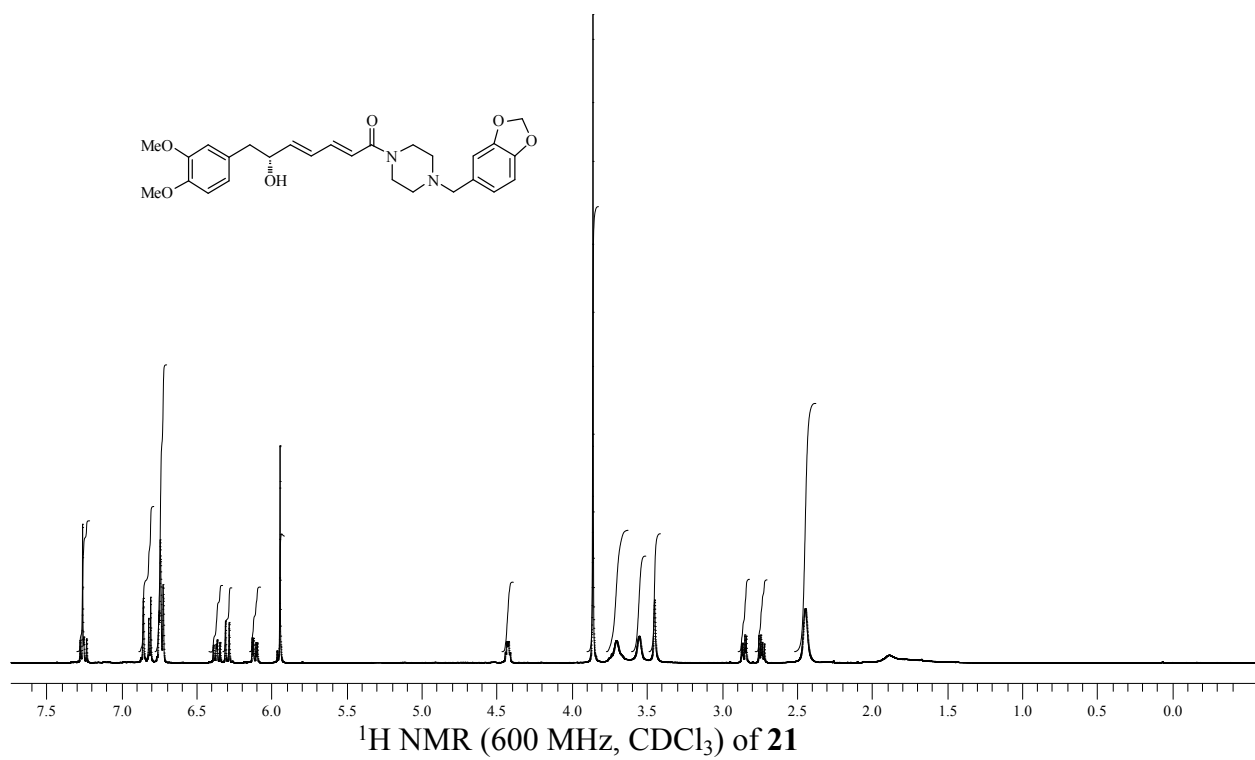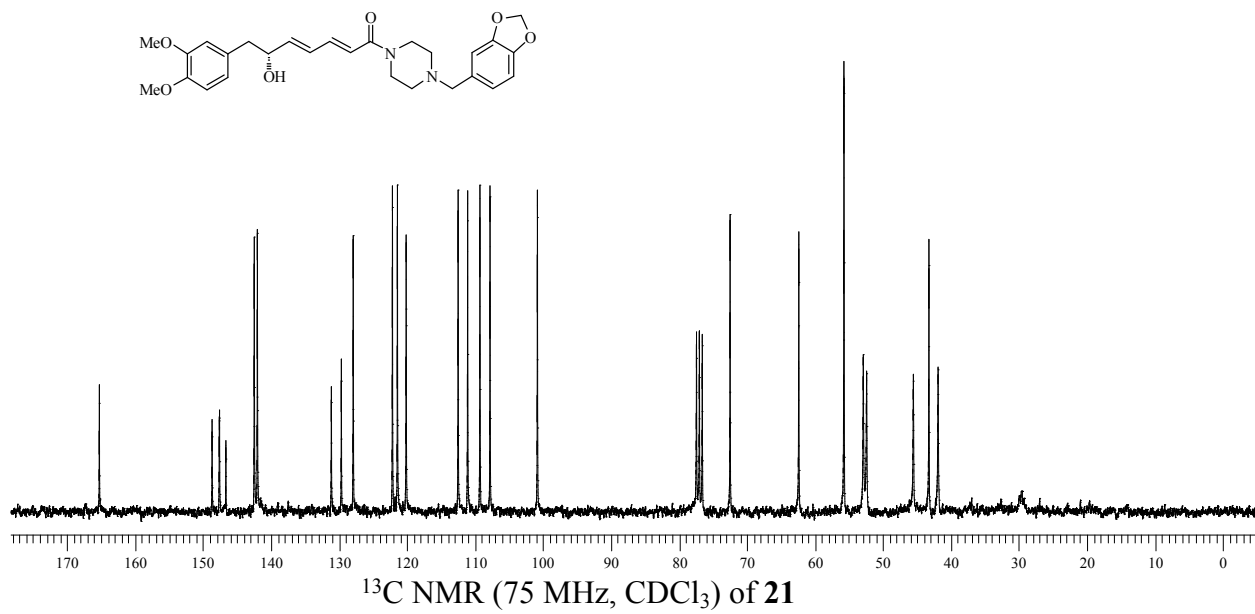

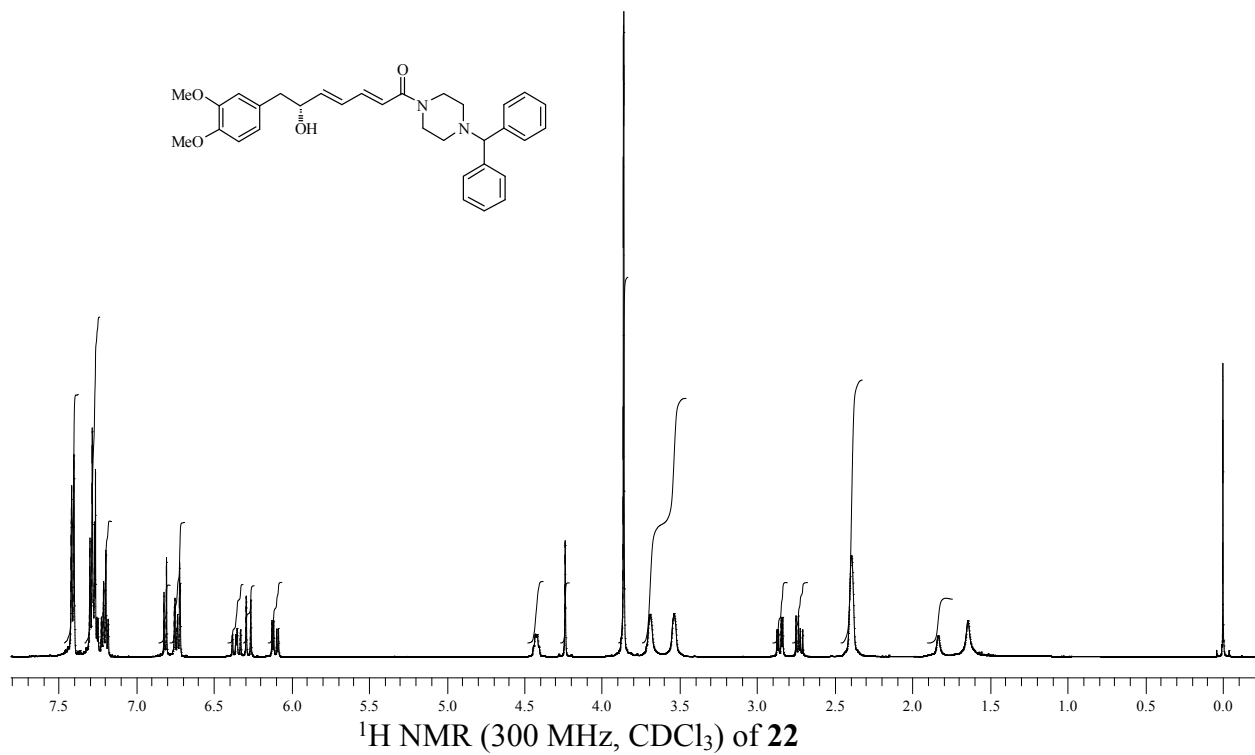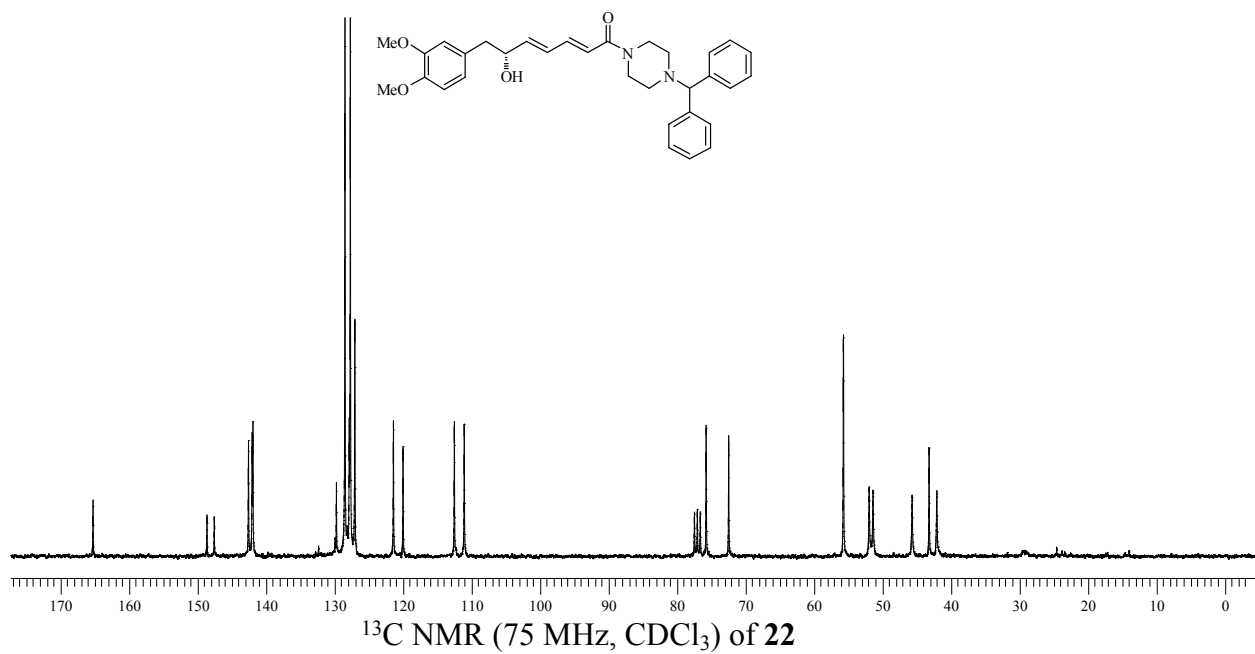

Supplement: MD-008-C6MD00606J-s001.pdf [file MD-008-C6MD00606J-s001.pdf]
